# Supplementary material for: Evaluation of public cancer datasets and signatures identifies TP53 mutant signatures with robust prognostic and predictive value
Source: Springer Nature journal article supplement (doi:10.1186/s12885-015-1102-7), 2015-03-25
Supplement: MOESM1 [file 9743996]

**Table S1. Overview of meta-analysis of signatures in cancer**

| <b>Signature ID</b> | <b>Description</b>                                                                                                                           | <b>Disease</b> |
|---------------------|----------------------------------------------------------------------------------------------------------------------------------------------|----------------|
| PMID10741968Sig43   | Fibroblasts from Hutchinson-Gilford Progeria                                                                                                 | Aging          |
| PMID14769913Sig3413 | Alzheimer's Disease(AD)-Related Genes"                                                                                                       | Alzheimer's    |
| PMID14769913Sig609  | 609 "Incipient ADGs" or IADGs                                                                                                                | Alzheimer's    |
| PMID11559565Sig102  | Glioblastoma Multiforme (GBM)                                                                                                                | Brain cancer   |
| PMID10582678Sig16   | Metastatic breast cancer                                                                                                                     | Breast Cancer  |
| PMID10963602Sig412  | Intrinsic Gene Subset                                                                                                                        | Breast Cancer  |
| PMID11165872Sig16   | MCF-7 Cell Line Overexpressing MnSOD                                                                                                         | Breast Cancer  |
| PMID11207349Sig51   | BRCA1, BRCA2, and the Sporadic Tumors                                                                                                        | Breast Cancer  |
| PMID11553815Sig33   | SAM264 Clone Set (Luminal/ER+ Cluster)                                                                                                       | Breast Cancer  |
| PMID11553815Sig40   | SAM264 Clone Set (Basal Epithelial Cluster)                                                                                                  | Breast Cancer  |
| PMID11553815Sig66   | SAM264 Clone Set (Proliferation Cluster)                                                                                                     | Breast Cancer  |
| PMID11562467Sig100  | ER+ Tumor Samples                                                                                                                            | Breast Cancer  |
| PMID11823860Sig70   | MammaPrint for breast cancer relapse prediction                                                                                              | Breast Cancer  |
| PMID11988840Sig170  | Cancer Progression Signature                                                                                                                 | Breast Cancer  |
| PMID12096084Sig110  | 110 BRCA-Discriminating Genes                                                                                                                | Breast Cancer  |
|                     | Treatment with Hydrogen Peroxide, Menadione, or t-Butyl Hydroperoxide in MCF7 Human Breast Cancer Cells                                      |                |
| PMID12414654Sig70   |                                                                                                                                              | Breast Cancer  |
| PMID12495447Sig57   | Rho <sup>0</sup> (Devoid of mtDNA) Breast Cancer Cell Line                                                                                   | Breast Cancer  |
| PMID12538167Sig23   | 23-Gene Set                                                                                                                                  | Breast Cancer  |
| PMID12610208Sig60   | Classification of familial non-BRCA1/BRCA2                                                                                                   | Breast Cancer  |
| PMID12714683Sig200  | Top 200 Genes Correlating with Tumor Grade                                                                                                   | Breast Cancer  |
|                     | Cluster of 29 Genes Showing Consistent Up-Regulation in IDC                                                                                  |                |
| PMID12714683Sig29   |                                                                                                                                              | Breast Cancer  |
| PMID12714683Sig85   | 85 Genes with Increased Expression in IDC                                                                                                    | Breast Cancer  |
|                     | Genes Associated with Metagene Predictors of Breast Cancer Recurrence                                                                        |                |
| PMID12747878Sig164  |                                                                                                                                              | Breast Cancer  |
|                     | Genes Associated with Metagene Predictors of Lymph-Node Metastasis                                                                           |                |
| PMID12747878Sig176  |                                                                                                                                              | Breast Cancer  |
| PMID12829800Sig500  | Intrinsic Gene List                                                                                                                          | Breast Cancer  |
| PMID12842083Sig102  | In Vivo-Selected Bone Metastasis Signature                                                                                                   | Breast Cancer  |
|                     | 11 Genes that Differed by >4-Fold in Expression Level between Weak and Strong Metastatic Groups                                              |                |
| PMID12842083Sig11   |                                                                                                                                              | Breast Cancer  |
| PMID12917485Sig137  | High-Grade Breast Tumors                                                                                                                     | Breast Cancer  |
| PMID12917485Sig485  | Breast Cancer Relapse                                                                                                                        | Breast Cancer  |
| PMID12917485Sig606  | ER+ Breast Tumors                                                                                                                            | Breast Cancer  |
|                     | One of these Six Subgroups of Breast Cancer Tumors: Her-2/neu, Basal-Like 1, Basal-Like 2, Luminal-Like 1, Luminal-Like 2, or Luminal-Like 3 |                |
| PMID12917485Sig706  |                                                                                                                                              | Breast Cancer  |
| PMID14737112Sig32   | HMGA1a-Induced Expression Profile                                                                                                            | Breast Cancer  |
| PMID14871811BCSig39 | Breast Carcinomas                                                                                                                            | Breast Cancer  |
| PMID15073102Sig13   | 13-Gene Signature                                                                                                                            | Breast Cancer  |
| PMID15073102Sig14   | 14-Gene Signature                                                                                                                            | Breast Cancer  |
| PMID15073102Sig3    | 3-Gene Signature                                                                                                                             | Breast Cancer  |
| PMID15073102Sig4    | 4-Gene Signature                                                                                                                             | Breast Cancer  |
| PMID15073102Sig5    | 5-Gene Signature                                                                                                                             | Breast Cancer  |

|                     |                                                                                                                                                                                                                            |               |
|---------------------|----------------------------------------------------------------------------------------------------------------------------------------------------------------------------------------------------------------------------|---------------|
| PMID15073102Sig6    | 6-Gene Signature<br>Multigene Predictor of Pathologic Complete Response (pCR) to Sequential Weekly Paclitaxel and Fluorouracil + Doxorubicin + Cyclophosphamide (T/FAC) Neoadjuvant Chemotherapy Regimen for Breast Cancer | Breast Cancer |
| PMID15136595Sig74   | Estrogen-Stimulated ZR-75-1 Cells                                                                                                                                                                                          | Breast Cancer |
| PMID15171711Sig96   | HOXB13:IL17BR Expression Ratio                                                                                                                                                                                             | Breast Cancer |
| PMID15193263Sig2    | 5-year Postoperative Poor Prognosis of Primary Breast Cancers                                                                                                                                                              | Breast Cancer |
| PMID15235906Sig21   | 5-year Postoperative Good Prognosis of Primary Breast Cancers                                                                                                                                                              | Breast Cancer |
| PMID15235906Sig23   | ER $\alpha$ -Positive Cell Lines and Tumor Biopsies                                                                                                                                                                        | Breast Cancer |
| PMID15254972Sig61   | Immortal Cell Lines                                                                                                                                                                                                        | Breast Cancer |
| PMID15260889Sig681  | Ductal Carcinoma in situ (DCIS)                                                                                                                                                                                            | Breast Cancer |
| PMID15318932Sig50   | Hormones, Growth Factors and Receptors Showing 8-Fold or Greater Change in mRNA Expression between the Tumor and Normal Breast Tissue Genes Located Near the Breakpoint Regions (8p23 and 16q21)                           | Breast Cancer |
| PMID15588851Sig10   | 90-Gene Meta-Signature                                                                                                                                                                                                     | Breast Cancer |
| PMID15588851Sig4    | MCF-7 Cells Transfected Overnight with Empty pcDNA3 Vector and Postincubated with Estrogen (E2) (1 $\mu$ M, 24 h)                                                                                                          | Breast Cancer |
| PMID15598354Sig90   | CON (Untransfected) MCF-7 Cells Postincubated with Estrogen (CON+E2) (1 $\mu$ M, 24 h)                                                                                                                                     | Breast Cancer |
| PMID15637295Sig111  | Breast Cancer Cells Exposed to Dexamethasone (Dex)                                                                                                                                                                         | Breast Cancer |
| PMID15637295Sig96   | Tamoxifen-Responsive Estrogen Receptor-Positive Primary Breast Carcinomas                                                                                                                                                  | Breast Cancer |
| PMID15679045Sig13   | 76-Gene Prognostic Signature (for Development of Metastasis)                                                                                                                                                               | Breast Cancer |
| PMID15681518Sig81   | Genes whose Expression is Correlated with that of Neighboring Genes in Infiltrating Ductal Breast Carcinoma                                                                                                                | Breast Cancer |
| PMID15721472Sig76   | Estrogen Receptor Alpha Status Signature                                                                                                                                                                                   | Breast Cancer |
| PMID15735024Sig3373 | Stromal Genes Signature                                                                                                                                                                                                    | Breast Cancer |
| PMID15762987Sig183  | Luminal/Apocrine/Basal Gene Set                                                                                                                                                                                            | Breast Cancer |
| PMID15869330Sig786  | Breast cancer cell proliferation signature                                                                                                                                                                                 | Breast Cancer |
| PMID15897907Sig3198 | Preoperative Systemic Chemotherapy (PST) with Epirubicin/Cyclophosphamide (EC) Favorable Outcome Signature                                                                                                                 | Breast Cancer |
| PMID15899795Sig50   | breast cancer all subtypes                                                                                                                                                                                                 | Breast Cancer |
| PMID16091131Sig31   | 32-gene p53 signature                                                                                                                                                                                                      | Breast Cancer |
| PMID16115903Sig298  | 64-Gene Set                                                                                                                                                                                                                | Breast Cancer |
| PMID16141321Sig32   | Epigallocatechin-3 Gallate (EGCG) Signature                                                                                                                                                                                | Breast Cancer |
| PMID16280042Sig64   | Endometria Obtained from Women Using Tamoxifen                                                                                                                                                                             | Breast Cancer |
| PMID16317158Sig23   | TGF- $\beta$ in HER-2 Overexpressing Mesenchymal MDA-MB-231                                                                                                                                                                | Breast Cancer |
| PMID16322341Sig69   | AS-raf-ODN Treated (Raf-1 Protein Kinase Inhibited) Cells                                                                                                                                                                  | Breast Cancer |
| PMID16457687Sig76   | 97-Gene List                                                                                                                                                                                                               | Breast Cancer |
| PMID16465392Sig17   | Breast Cancer Proliferation Cluster                                                                                                                                                                                        | Breast Cancer |
| PMID16478745Sig97   |                                                                                                                                                                                                                            |               |
| PMID16491069Sig45   |                                                                                                                                                                                                                            |               |

|                        |                                                                                                                                                    |               |
|------------------------|----------------------------------------------------------------------------------------------------------------------------------------------------|---------------|
| PMID16495925Sig43      | TGF $\beta$ Pathway, EMT Control and Cytoskeletal (Re)organization Signature                                                                       | Breast Cancer |
| PMID16505416Sig822     | Estrogen-SAM List                                                                                                                                  | Breast Cancer |
| PMID16536878Sig232     | ANOVA-Analysis Output                                                                                                                              | Breast Cancer |
| PMID16536878Sig27      | PAM-Analysis Output                                                                                                                                | Breast Cancer |
| PMID16626501Sig53      | 53 Classifier Genes                                                                                                                                | Breast Cancer |
| PMID16636340Sig87      | Genes Involved in Bone Metastasis of Breast Cancer                                                                                                 | Breast Cancer |
| PMID16643655Sig306     | Single Sample Predictor                                                                                                                            | Breast Cancer |
| PMID16651414Sig527     | List of 527 Probe Sets Significantly Differentially Expressed between Medullary and Ductal Breast Cancers                                          | Breast Cancer |
| PMID16752223Sig4       | ABC Transporters Selected as Best Classifiers at a Significance Threshold of 0.003                                                                 | Breast Cancer |
| PMID16849555Sig22      | Identities of the 22 Genes Coordinately Repressed Late in 3D Time Course                                                                           | Breast Cancer |
| PMID16849555Sig60      | List of All 60 3D Differential Genes on Affymetrix HG-U133A and Rosetta Chips                                                                      | Breast Cancer |
| PMID16886892Sig57      | Fibrocystic Breast Cell Line (MCF-10a) Exposed to 10 $\mu$ M Lycopene for 48 h                                                                     | Breast Cancer |
| PMID16896004Sig30      | 30-Probe Set Predictor (DLDA-30)                                                                                                                   | Breast Cancer |
| PMID16936776Sig200     | Top 200 Cox-Ranked Genes                                                                                                                           | Breast Cancer |
| PMID16965636ERBB2Sig10 | BCMP11/ABCC11 Group 2                                                                                                                              | Breast Cancer |
| PMID16965636ESR1Sig10  | BCMP11/ABCC11 Group 1                                                                                                                              | Breast Cancer |
| PMID16965636Sig10      | BCMP11/ABCC11 Group 3                                                                                                                              | Breast Cancer |
| PMID16979889Sig60      | Well-Established Breast Cancer Cell Line with High Metastatic Potential (MDA-MB-435HM)                                                             | Breast Cancer |
| PMID17016441Sig5       | Cytokeratin induced genes in Basal-Like Cancers Remained Free from Distant Recurrence for 40 Months or Longer                                      | Breast cancer |
| PMID17023159Sig20      | Ductal Carcinoma in situ                                                                                                                           | Breast Cancer |
| PMID17069663Sig35      | Well-Differentiated DCIS                                                                                                                           | Breast Cancer |
| PMID17069663Sig43      | Well/Well-Intermediately-Differentiated DCIS                                                                                                       | Breast Cancer |
| PMID17069663Sig78      | Poorly-Differentiated DCIS Samples                                                                                                                 | Breast Cancer |
| PMID17069663Sig80      | Consensus Prognostic Gene Expression Classifier for ER-Positive (+) Breast Cancer                                                                  | Breast Cancer |
| PMID17076897Sig52      | PAM 264-Gene Classifier                                                                                                                            | Breast Cancer |
| PMID17079448Sig264     | Lymph Node Metastases                                                                                                                              | Breast Cancer |
| PMID17123152Sig79      | p53 Loss Signature                                                                                                                                 | Breast Cancer |
| PMID17150101Sig52      | Genes in Recurrent Amplicons Associated with Reduced Survival Duration in Breast Cancer                                                            | Breast Cancer |
| PMID17157792Sig66      | 59 RB (Retinoblastoma Tumor Suppressor) Target Genes                                                                                               | Breast Cancer |
| PMID17160137Sig59      | Tumor Samples with Somatic Alterations                                                                                                             | Breast Cancer |
| PMID17224074Sig16      | List of Overexpressed Candidate Genes in Breast Cancer Compared to Normal Tissues, Identified by cDNA (EST) and the SAGE DGED from the CGAP Server | Breast Cancer |
| PMID17245340Sig15      | SAGE Tags Statistically Significantly Differentially Expressed Between Metastatic CD44+ and CD24+ Cells                                            | Breast Cancer |
| PMID17349583Sig1208    | ER $\beta$ Gene Expression Signature                                                                                                               | Breast Cancer |
| PMID17404078Sig50      | 28-Gene Signature for Breast Cancer Recurrent and Metastatic Potential                                                                             | Breast Cancer |
| PMID17404081Sig28      |                                                                                                                                                    | Breast Cancer |

|                     |                                                                                                                                                                                                                                        |               |
|---------------------|----------------------------------------------------------------------------------------------------------------------------------------------------------------------------------------------------------------------------------------|---------------|
| PMID17428335Sig182  | PAM Gene List                                                                                                                                                                                                                          | Breast Cancer |
| PMID17428335Sig22   | Overlap Genes                                                                                                                                                                                                                          | Breast Cancer |
| PMID17428335Sig52   | Correlation Genes                                                                                                                                                                                                                      | Breast Cancer |
| PMID17428335Sig63   | SAM Gene List                                                                                                                                                                                                                          | Breast Cancer |
| PMID17555561Sig2659 | Pre-Treatment Biopsies of Primary Estrogen Receptor Positive Breast Cancer Patients Assigned to Treatment with Anastrozole or Letrozole for 2 Weeks before Surgery                                                                     | Breast Cancer |
| PMID17640171Sig7    | Genistein-Treated HCC1395 Breast Cancer Cells Cluster #3 (EGFR-Associated Signature Highly Enriched for Luminal A and B Tumors and Highly Expressed in Most of the HER2+/ER- and Basal-Like Tumors that were also High for Cluster #2) | Breast Cancer |
| PMID17663798Sig139  | Cluster #2 (EGFR-Associated Signature Enriched in 58% of All Basal-Like Tumors, 48% of All HER2+/ER- Tumors and 3 Luminal B Tumors)                                                                                                    | Breast Cancer |
| PMID17663798Sig27   | Cluster #1 (EGFR-Associated Signature Enriched in a Mix of Breast Tumors that Contained All Five Breast Cancer Subtypes: Luminal A, Luminal B, Basal-Like, HER2+/ER-, and Normal-Like Samples)                                         | Breast Cancer |
| PMID17663798Sig35   | Treatment of MCF-7 Cells with 17 $\beta$ -estradiol (E <sub>2</sub> ) and the Extract of <i>Glycyrrhiza glabra</i> root                                                                                                                | Breast Cancer |
| PMID17664038Sig18   | DTC (Disseminated Tumor Cells) Signature                                                                                                                                                                                               | Breast Cancer |
| PMID17785550Sig67   | SV40 T/t-antigen Oncogene Signature                                                                                                                                                                                                    | Breast Cancer |
| PMID17804718Sig61   | 60-Gene Profile                                                                                                                                                                                                                        | Breast Cancer |
| PMID17883867Sig60   | breast cancer with Aromatase Inhibitor Letrozole                                                                                                                                                                                       | Breast Cancer |
| PMID17885619Sig143  | Stromal Fibroblasts Deriving from Malignant Tissue of Women with Invasive Breast Cancer                                                                                                                                                | Breast Cancer |
| PMID17899370Sig45   | 374 Gene Set                                                                                                                                                                                                                           | Breast Cancer |
| PMID17899371Sig374  | Four Epithelial Genes                                                                                                                                                                                                                  | Breast Cancer |
| PMID17952122Sig4    | Inflammatory Breast Cancer Tumor Stroma                                                                                                                                                                                                | Breast Cancer |
| PMID17999412Sig24   | Cyclophosphamide 35 Probesets                                                                                                                                                                                                          | Breast Cancer |
| PMID18024211Sig35   | Fluorouracil 46 Probesets                                                                                                                                                                                                              | Breast Cancer |
| PMID18024211Sig46   | Docetaxel 47 Probesets                                                                                                                                                                                                                 | Breast Cancer |
| PMID18024211Sig47   | Doxorubicin 74 Probesets                                                                                                                                                                                                               | Breast Cancer |
| PMID18024211Sig74   | One of these Four Main Groups of Tumors: ECM1, ECM2, ECM3, or ECM4                                                                                                                                                                     | Breast Cancer |
| PMID18044827Sig278  | Breast Epithelium of Parous Control Women                                                                                                                                                                                              | Breast Cancer |
| PMID18199711Sig229  | 73-Gene Outcome Signature                                                                                                                                                                                                              | Breast Cancer |
| PMID18231641Sig73   | Predictor Gene Set for TP53 Status                                                                                                                                                                                                     | Breast Cancer |
| PMID18271932Sig33   | Integrated 24-Gene Signature                                                                                                                                                                                                           | Breast Cancer |
| PMID18278552Sig24   | 112-Gene Breast Cancer Prognostic Signature                                                                                                                                                                                            | Breast Cancer |
| PMID18304324Sig112  | Genes Uniquely Regulated by Tamoxifen                                                                                                                                                                                                  | Breast Cancer |
| PMID18338247Sig14   | Estrogen-Regulated Genes that Changed with Aromatase Inhibitor and Aromatase Inhibitor + Tamoxifen Treatment                                                                                                                           | Breast Cancer |
| PMID18338247Sig183  | Tamoxifen "Estrogen-Like" Agonist Genes whose Expression Changes with Treatment                                                                                                                                                        | Breast Cancer |
| PMID18338247Sig23   | Endocrine Therapy Response                                                                                                                                                                                                             | Breast Cancer |
| PMID18338247Sig25   | Genes Regulated by Tamoxifen in the Same Manner as Estrogen                                                                                                                                                                            | Breast Cancer |
| PMID18338247Sig298  | Genes Expressed Differentially in Nonresponders                                                                                                                                                                                        | Breast Cancer |
| PMID18338247Sig736  |                                                                                                                                                                                                                                        | Breast Cancer |

|                         | Compared to Responders                                                                                                                                         |               |
|-------------------------|----------------------------------------------------------------------------------------------------------------------------------------------------------------|---------------|
| PMID18347175Sig36       | 36-Gene PAM Signature                                                                                                                                          | Breast Cancer |
| PMID18360352Sig21       | Oncotype DX Breast Cancer Assay                                                                                                                                | Breast Cancer |
|                         | Pathologic Complete Response (PCR) to Weekly Paclitaxel Administration Followed by Chemotherapy with 5-Fluorouracil, Doxorubicin, and Cyclophosphamide (T/FAC) |               |
| PMID18366635Sig30       |                                                                                                                                                                | Breast Cancer |
| PMID18381933Sig1001     | ERBB2-Amplified Ductal Carcinoma in situ                                                                                                                       | Breast Cancer |
|                         | Human Estrogen-Responsive Breast Cancer Cells (ZR-75.1) Cultured in Steroid-Free Medium for 4 Days                                                             |               |
| PMID18387200Sig1488     |                                                                                                                                                                | Breast Cancer |
| PMID18414401Sig66       | Desmoid-Type Fibromatosis Core Gene Set                                                                                                                        | Breast Cancer |
| PMID18425577Sig182      | ER+/PR+ Signature                                                                                                                                              | Breast Cancer |
| PMID18425577Sig594      | ER-PR-_signature_down                                                                                                                                          | Breast Cancer |
| PMID18451222Sig5        | Five-Gene Molecular Grade Index                                                                                                                                | Breast Cancer |
| PMID18498629Sig181      | 181-Gene Classifier                                                                                                                                            | Breast Cancer |
| PMID18592372Sig2160     | ER-Positive (+) Breast Cancer                                                                                                                                  | Breast Cancer |
| PMID18593943ERBB2Sig56  | Chromosome 17 (ERBB2) Cluster                                                                                                                                  | Breast Cancer |
| PMID18593943JunFosSig56 | Jun-Fos Cluster                                                                                                                                                | Breast Cancer |
| PMID18593943Sig117      | Estrogen Receptor (Luminal) Cluster                                                                                                                            | Breast Cancer |
| PMID18593943Sig125      | Transcription Cluster                                                                                                                                          | Breast Cancer |
| PMID18593943Sig130      | T-Cell Cluster                                                                                                                                                 | Breast Cancer |
| PMID18593943Sig169      | Stromal Cluster                                                                                                                                                | Breast Cancer |
| PMID18593943Sig221      | Basal-Like Cluster                                                                                                                                             | Breast Cancer |
| PMID18593943Sig276      | Normal-Like Cluster                                                                                                                                            | Breast Cancer |
| PMID18593943Sig35       | Interferon Cluster                                                                                                                                             | Breast Cancer |
| PMID18593943Sig58       | B-Cell Cluster                                                                                                                                                 | Breast Cancer |
| PMID18593943Sig94       | Proliferation Cluster                                                                                                                                          | Breast Cancer |
| PMID1861214845yoSig50   | Age $\leq$ 45 Years Signature                                                                                                                                  | Breast Cancer |
| PMID1861214865yoSig50   | Age $\geq$ 65 Years Signature                                                                                                                                  | Breast Cancer |
| PMID18625725Sig271      | Activated TGF-beta Type I Receptor Signature                                                                                                                   | Breast Cancer |
| PMID18631401Sig75       | Ox-E/ER gene signature                                                                                                                                         | Breast Cancer |
| PMID18662380Sig20       | (HER2 Signaling) ERBB2 Coexpression Module [Estrogen Receptor (ER) Signaling] ESR1                                                                             | Breast Cancer |
| PMID18662380Sig288      | Coexpression Module                                                                                                                                            | Breast Cancer |
| PMID18662380Sig355      | (Proliferation) AURKA Coexpression Module                                                                                                                      | Breast Cancer |
| PMID18684329Sig127      | Consensus Signature                                                                                                                                            | Breast Cancer |
| PMID18698033Sig10       | CASP3 (Apoptosis) Module                                                                                                                                       | Breast Cancer |
| PMID18698033Sig14       | VEGF (Angiogenesis) Module                                                                                                                                     | Breast Cancer |
| PMID18698033Sig229      | AURKA (Proliferation) Module                                                                                                                                   | Breast Cancer |
| PMID18698033Sig28       | ERBB2 (HER2 Signaling) Module                                                                                                                                  | Breast Cancer |
| PMID18698033Sig469      | ESR1 (ER Signaling) Module                                                                                                                                     | Breast Cancer |
| PMID18698033Sig68       | PLAU (Tumor Invasion) Module                                                                                                                                   | Breast Cancer |
| PMID18698033Sig95       | STAT1 (Immune Response) Module                                                                                                                                 | Breast Cancer |
| PMID18714348Sig22       | 22-Gene 3D-Signature                                                                                                                                           | Breast Cancer |
| PMID18757322Sig1084     | IGF-I Signature                                                                                                                                                | Breast Cancer |
| PMID18786252Sig26       | Cell Cycle Gene Signature                                                                                                                                      | Breast Cancer |
| PMID18812439Sig15       | miRNA Signature                                                                                                                                                | Breast Cancer |
| PMID18812439Sig52       | miRNA Targets Signature                                                                                                                                        | Breast Cancer |

|                    |                                                                                                                |               |
|--------------------|----------------------------------------------------------------------------------------------------------------|---------------|
| PMID19010862Sig205 | IBC Signature                                                                                                  | Breast Cancer |
| PMID19010929Sig41  | 41 Breast Cancer–Specific ASEs (Alternative Splicing Events)                                                   | Breast Cancer |
| PMID19014521Sig159 | Immune Module                                                                                                  | Breast Cancer |
| PMID19014521Sig41  | RNA Splicing Module                                                                                            | Breast Cancer |
| PMID19014521Sig72  | expression Grade Index [25]                                                                                    | Breast Cancer |
| PMID19043454Sig217 | 217-Gene SAM List                                                                                              | Breast Cancer |
| PMID19101988Sig18  | Expression Levels of Genes that are Potentially Involved in the Maintenance of Genomic Stability               | Breast Cancer |
| PMID19101988Sig38  | Commonly Differentially Expressed Genes for the Comparisons of dGS, aGS, and aGU Breast Carcinomas             | Breast Cancer |
| PMID19112599Sig40  | Molecular Signature of Metastasis                                                                              | Breast Cancer |
| PMID19204204Sig50  | PAM50                                                                                                          | Breast Cancer |
| PMID19225562Sig19  | Tumor Stroma of African-American Patients Independent of the Tumors' ER-Status                                 | Breast Cancer |
| PMID19225562Sig30  | Tumor Epithelium of the ER-Negative Tumors of African-American Patients                                        | Breast Cancer |
| PMID19225562Sig46  | Tumor Epithelium of the ER-Positive Tumors of African-American Patients                                        | Breast Cancer |
| PMID19225562Sig485 | LCM-Dissected Tumor Epithelium of African-American Breast Cancer Patients                                      | Breast Cancer |
| PMID19225562Sig8   | Tumor Epithelium of African-American Patients Independent of the Tumors' ER-Status                             | Breast Cancer |
| PMID19249242Sig36  | Exons Located in Unchanged Genes that are Overexpressed in Malignant Tumors with High Splice Indices in Cancer | Breast Cancer |
| PMID19249242Sig71  | Genes Overexpressed (More than Two Times) in Breast Cancer Compared with Benign Lesions                        | Breast Cancer |
| PMID19266279Sig16  | Malignancy-Risk Genes with p Value < 0.05                                                                      | Breast Cancer |
| PMID19266279Sig30  | 30 Selected Malignancy-Risk Signature Genes                                                                    | Breast Cancer |
| PMID19266279Sig37  | Subset of Malignancy-Risk Genes Associated with DNA Replication, Mitosis, and Cancer Risk                      | Breast Cancer |
| PMID19435916Sig29  | Claudin-Low Gene Cluster                                                                                       | Breast Cancer |
| PMID19435916Sig929 | MBC versus Common Breast Tumor Expression Signature                                                            | Breast Cancer |
| PMID19455244Sig5   | Tumor Metastasis Signature                                                                                     | Breast Cancer |
| PMID19497124Sig81  | High-Dose Hyperfractionated Radical Radiotherapy Signature                                                     | Breast Cancer |
| PMID19666588Sig493 | CD44 <sup>+</sup> /CD24 <sup>-/low</sup> -Mammosphere Gene Signature                                           | Breast Cancer |
| PMID19723662Sig12  | Probesets Used for Molecular Subtype Assignment                                                                | Breast Cancer |
| PMID19724859Sig60  | Residual Breast Cancer before Doxorubicin and Cyclophosphamide Neoadjuvant Chemotherapy                        | Breast Cancer |
| PMID19755993Sig28  | Trastuzumab Response Signature                                                                                 | Breast Cancer |
| PMID19967557Sig23  | 23-Gene Signature which Predicts Response of Basal-Like Breast Cancer to Neoadjuvant Chemotherapy              | Breast Cancer |
| PMID20068109Sig184 | Good Prognosis Signature                                                                                       | Breast Cancer |
| PMID20068109Sig271 | Poor Prognosis Signature                                                                                       | Breast Cancer |
| PMID20078854Sig160 | breast cancer signature                                                                                        | Breast Cancer |
| PMID20098429Sig12  | 8q22 Amplification Signature                                                                                   | Breast Cancer |
| PMID20156340Sig22  | HER2+ Subtype Signature                                                                                        | Breast Cancer |

|                            |                                                                                                                                                                                                             |               |
|----------------------------|-------------------------------------------------------------------------------------------------------------------------------------------------------------------------------------------------------------|---------------|
| PMID20156340Sig229         | ER+/HER2- Subtype Signature                                                                                                                                                                                 | Breast Cancer |
| PMID20156340Sig63          | ER-/HER2- Subtype Signature                                                                                                                                                                                 | Breast Cancer |
| PMID20158880Sig10          | Selected Non-Redundant Survival-Significant Gene Pairs Identified in Both Cohorts of Breast Cancer Patients                                                                                                 | Breast Cancer |
| PMID20158880Sig4           | Individual Genes Selected among the TNFAIP1/POLDIP2 SFGM (Structural-Functional Gene Module) and 6 "Neighboring" Genes which Proved to be Survival Significant in at Least One Cohort (P Value $\leq$ 0.05) | Breast Cancer |
| PMID20158880StockholmSig11 | P Values of Kolmogorov-Smirnov Test of Normality in Stockholm cohort for 5 Genes in SFGM Group (SFGM Matrix) and 6 "Neighboring" Genes                                                                      | Breast Cancer |
| PMID20158880StockholmSig17 | P Values of Kolmogorov-Smirnov Test of Normality in Stockholm Cohort for 17 Genes of ERBB2 Amplicon on 17q12                                                                                                | Breast Cancer |
| PMID20158880UppsalaSig11   | P Values of Kolmogorov-Smirnov Test of Normality in Uppsala cohort for 5 Genes in SFGM Group (SFGM Matrix) and 6 "Neighboring" Genes                                                                        | Breast Cancer |
| PMID20158880UppsalaSig17   | P Values of Kolmogorov-Smirnov Test of Normality in Uppsala Cohort for 17 Genes of ERBB2 Amplicon on 17q12                                                                                                  | Breast Cancer |
| PMID20368555Sig1022        | GSE3494 ER Predictor Gene List                                                                                                                                                                              | Breast Cancer |
| PMID20368555Sig205         | GSE1456 Recurrence Predictor Gene List                                                                                                                                                                      | Breast Cancer |
| PMID20368555Sig50          | Docetaxel Chemosensitivity Signature Gene List                                                                                                                                                              | Breast Cancer |
| PMID20368555Sig52          | Adriamycin Chemosensitivity Signature Gene List                                                                                                                                                             | Breast Cancer |
| PMID20490655Sig368         | 368-Gene SVM Model                                                                                                                                                                                          | Breast Cancer |
| PMID20521089Sig35          | Genes that Demonstrate Significantly Correlated or Anti-Correlated Expression with CD24 across the Basal B Cell Lines                                                                                       | Breast Cancer |
| PMID20521089Sig55          | Basal B Breast Cancer Cell Line Subtype                                                                                                                                                                     | Breast Cancer |
| PMID20521089Sig57          | Genes that Demonstrate Correlated or Anti-Correlated Expression with CD24 across the Basal B Cell Lines                                                                                                     | Breast Cancer |
| PMID20521089Sig80          | Occurrence of the Epithelial-Mesenchymal Transition in Breast Cancer Cell Lines                                                                                                                             | Breast Cancer |
| PMID20697068Sig165         | Sensitivity to Endocrine Therapy (SET) Index                                                                                                                                                                | Breast Cancer |
| PMID20713713Sig251         | EMT Core Signature                                                                                                                                                                                          | Breast Cancer |
| PMID20813035Sig1048        | CD49 <sup>+</sup> /EpCAM <sup>-low</sup> SUM149PT (Basal-Like) Cells Fraction Signature                                                                                                                     | Breast Cancer |
| PMID20813035Sig1177        | Normal Breast-Like Tumor Signature                                                                                                                                                                          | Breast Cancer |
| PMID20813035Sig1275        | Luminal Tumor Signature                                                                                                                                                                                     | Breast Cancer |
| PMID20813035Sig137         | Cell Adhesion Genes in Claudin-Low Tumors Signature                                                                                                                                                         | Breast Cancer |
| PMID20813035Sig1447        | Basal-Like Tumor Signature                                                                                                                                                                                  | Breast Cancer |
| PMID20813035Sig1667        | Claudin-Low Tumor Signature                                                                                                                                                                                 | Breast Cancer |
| PMID20813035Sig19          | Luminal Gene Cluster                                                                                                                                                                                        | Breast Cancer |
| PMID20813035Sig26          | Claudin-Low versus Basal-Like Signature                                                                                                                                                                     | Breast Cancer |
| PMID20813035Sig41          | Proliferation Gene Cluster                                                                                                                                                                                  | Breast Cancer |
| PMID20813035Sig509         | HER2-Enriched Tumor Signature                                                                                                                                                                               | Breast Cancer |
| PMID20813035Sig807         | Nine-Cell Line Claudin-Low Predictor                                                                                                                                                                        | Breast Cancer |
| PMID20932292Sig12          | Genes Targeted by the 17q12-q21-Amplicon in IBCs and NIBCs                                                                                                                                                  | Breast Cancer |

|                     |                                                                                                                                                     |                                                                |
|---------------------|-----------------------------------------------------------------------------------------------------------------------------------------------------|----------------------------------------------------------------|
| PMID20932292Sig37   | Genes whose Expression Levels were Downregulated and Upregulated in Proportion to DNA Copy Number Losses and Gains (or Amplification), Respectively | Breast Cancer                                                  |
| PMID20932292Sig402  | Genes with Expression Significantly Different in ER- and ER+ ERBB2-Amplified Tumors                                                                 | Breast Cancer                                                  |
| PMID20932292Sig43   | Copy Number Aberration (CNA) Signature                                                                                                              | Breast Cancer                                                  |
| PMID21176237Sig12   | Oncotype DX Colon Cancer Assay                                                                                                                      | Breast Cancer                                                  |
| PMID21501481Sig15   | Tumor Vascular Endothelial Normalization Signature                                                                                                  | Breast Cancer                                                  |
| PMID21501481Sig18   | Cell Cycle and Proliferation Signature                                                                                                              | Breast Cancer                                                  |
| PMID21501481Sig21   | Stromal Reaction Signature                                                                                                                          | Breast Cancer                                                  |
| PMID21501481Sig224  | Wound Response Signature                                                                                                                            | Breast Cancer                                                  |
| PMID21558518Sig26   | Early Relapse in ER-Negative Breast Cancer Signature                                                                                                | Breast Cancer                                                  |
| PMID21558518Sig32   | Early Relapse in ER-Positive Breast Cancer Signature                                                                                                | Breast Cancer                                                  |
| PMID21558518Sig37   | Excellent Pathologic Response in ER-Positive Breast Cancer Signature                                                                                | Breast Cancer                                                  |
| PMID21558518Sig51   | Extensive Residual Disease in ER-Negative Breast Cancer Signature                                                                                   | Breast Cancer                                                  |
| PMID21558518Sig52   | Excellent Pathologic Response in ER-Negative Breast Cancer Signature                                                                                | Breast Cancer                                                  |
| PMID21558518Sig73   | Extensive Residual Disease in ER-Positive Breast Cancer Signature                                                                                   | Breast Cancer                                                  |
| PMID23383020BRmet50 | a meta-signature in breast cancer for poor prognosis prediction                                                                                     | Breast Cancer                                                  |
| PMID16704732Sig222  | T-Cell Signature                                                                                                                                    | cell type specific                                             |
| PMID16704732Sig23   | CD8+ T-Cell Signature                                                                                                                               | cell type specific                                             |
| PMID16704732Sig411  | Granulocyte Signature                                                                                                                               | cell type specific                                             |
| PMID16704732Sig427  | B-Cell Signature                                                                                                                                    | cell type specific                                             |
| PMID16704732Sig67   | Lymphocyte Signature                                                                                                                                | cell type specific                                             |
| PMID11707567CMSig25 | Colon Metastasis Signature                                                                                                                          | Colon cancer                                                   |
| PMID17255271Sig19   | German 19-Gene Classifier                                                                                                                           | Colon cancer                                                   |
| PMID17255271Sig22   | New Zealand 22-Gene Classifier                                                                                                                      | Colon cancer                                                   |
| PMID19050079Sig50   | 50-Gene Predictor of Recurrence in Early Stage Colon Carcinoma                                                                                      | Colon cancer                                                   |
| PMID19914252Sig34   | 34-Gene Recurrence Classifier                                                                                                                       | Colon cancer<br>Complex<br>neuropsychiatric disorders          |
| PMID18470533Sig31   | Thirty-One Schizophrenia Susceptibility Genes                                                                                                       | Diabetes                                                       |
| PMID18599519Sig10   | gene cluster 2 from Type 1 Diabetes Monocytes                                                                                                       | Diabetes                                                       |
| PMID18599519Sig12   | gene cluster 1 from Monocytes of Bipolar Patients                                                                                                   | Embryonal<br>tumours of the<br>central nervous<br>system (CNS) |
| PMID11807556Sig100  | Supervised Learning Outcome Predictor                                                                                                               | Endometrial<br>Carcinomas                                      |
| PMID14522886Sig66   | Genes Differentially Expressed in Endometrial Carcinomas                                                                                            | Gastrointestinal<br>Stromal Tumors                             |
| PMID11965276Sig125  | Gastrointestinal Stromal Tumor Gene Cluster                                                                                                         |                                                                |
| PMID18714668Sig1658 | Preliminary Molecular Signature of Acute GVHD in Allogeneic HSCT Patients                                                                           | GVHD                                                           |
| PMID16467079Sig91   | 91 Top Classifiers for HPV Status by Significance                                                                                                   | Head and neck                                                  |



|                         | Analysis of Microarrays                                                                                                                 | cancer                                 |
|-------------------------|-----------------------------------------------------------------------------------------------------------------------------------------|----------------------------------------|
| PMID17409455Sig126      | HS-up (Hypoxia Score of the up-regulated genes)                                                                                         | Head and neck cancer                   |
| PMID17409455Sig68       | HS-down (Hypoxia Score of the down-regulated genes)                                                                                     | Head and neck cancer                   |
| PMID12648972Sig12       | Scoring System for Early Intrahepatic Recurrence                                                                                        | Hepatocellular carcinoma               |
| PMID15897992Sig10       | HIV Serostatus Predictor Set                                                                                                            | HIV-1 disease                          |
| PMID15897992Sig6        | 6-Gene Signature Set that can be Used to Distinguish Samples from Seropositive Persons with Decreasing or Increasing CD4+ T Cell Counts | HIV-1 disease                          |
| PMID15930270Sig16       | Tumor-Forming Genetic Signature (Genes Induced in a Highly Synergistic Manner Only when Both H-Ras and p53 Inactivation Occurred)       | Human fibroblasts oncogeni alternation |
| PMID15930270Sig38       | Inactivated p53-Associated Proliferation Signature                                                                                      | Human fibroblasts oncogeni alternation |
| PMID10521349Sig50       | AML-ALL Class Predictor                                                                                                                 | Leukemia                               |
| PMID12086872ALLSig20    | Discriminator of Relapse versus CCR in HD Cases                                                                                         | Leukemia                               |
| PMID12086872AMLSig20    | Predictor of the Development of Secondary AML in TEL-AML1-Positive ALLs                                                                 | Leukemia                               |
| PMID12086872Sig7        | Discriminator of Relapse versus CCR in T-ALL Cases                                                                                      | Leukemia                               |
| PMID12738660Sig35       | 35 Prognosis-Associated Genes                                                                                                           | Leukemia                               |
| PMID15084693Sig133      | 133-Gene Outcome Predictor                                                                                                              | Leukemia                               |
| PMID15084694Sig180      | PAM Genes of Prognostically Important Clusters (#13, #12, #9, #16, #10, #4, #15, #4 and #15, and FLT3ITD)                               | Leukemia                               |
| PMID20166207Sig82       | GEP of CLL-CECs and nCECs                                                                                                               | Leukemia                               |
| PMID20564080Sig16       | PK Genes Specifically Expressed in B-NEG Patients Versus at Least 2 Other Groups                                                        | Leukemia                               |
| PMID20564080Sig53       | PK Genes Distinctive of Each ALL Subgroup                                                                                               | Leukemia                               |
| PMID19514085Sig73       | 73-Gene Signature that Correlated with Vascular Invasion                                                                                | Liver cancer                           |
| PMID11707567C1Sig25     | Cluster C1 (Proliferation-Related Gene Expression)                                                                                      | Lung cancer                            |
| PMID11707567C2Sig25     | Cluster C2 (Neuroendocrine Gene Expression, Ornithine Decarboxylase 1 and Surfactant Gene Expression)                                   | Lung cancer                            |
| PMID11707567C3Sig25     | Cluster C3 (Ornithine Decarboxylase 1 and Surfactant Gene Expression, Type II Pneumocyte Gene Expression)                               | Lung cancer                            |
| PMID11707567C4Sig25     | Cluster C4 (Type II Pneumocyte Gene Expression)                                                                                         | Lung cancer                            |
| PMID11707567GroupISig25 | Group I Signature                                                                                                                       | Lung cancer                            |
| PMID11707590Sig20       | Lung cancer adenocarcinomas signature group 2                                                                                           | Lung cancer                            |
| PMID11707590Sig217      | Lung cancer adenocarcinomas signature all groups                                                                                        | Lung cancer                            |
| PMID11707590Sig26       | Small Cell Tumors                                                                                                                       | Lung cancer                            |
| PMID11707590Sig33       | Squamous Lung Tumors                                                                                                                    | Lung cancer                            |
| PMID11707590Sig38       | Large Cell Tumors                                                                                                                       | Lung cancer                            |
| PMID11707590Sig39       | Lung cancer adenocarcinomas signature group 1                                                                                           | Lung cancer                            |
| PMID11707590Sig90       | Lung cancer adenocarcinomas signature group 3                                                                                           | Lung cancer                            |
| PMID12036904Sig22       | Statistically Significant Genes for DFS from Cox Proportional Hazards Model Testing                                                     | Lung cancer                            |
| PMID12118244Sig100      | 100 Survival-Related Genes from low risk cancer                                                                                         | Lung cancer                            |

|                          |                                                                                                                                                                             |                              |
|--------------------------|-----------------------------------------------------------------------------------------------------------------------------------------------------------------------------|------------------------------|
|                          | group for lung adenocarcinoma                                                                                                                                               |                              |
| PMID14504202Sig7         | Lung Cancer Prognosis Signature                                                                                                                                             | Lung cancer                  |
| PMID14871811LACSig29     | Lung Adenocarcinomas                                                                                                                                                        | Lung cancer                  |
| PMID14871811LSCCSig48    | Lung Squamous Cell Carcinomas                                                                                                                                               | Lung cancer                  |
| PMID16049480Sig18        | Lung and Bone Metastasis                                                                                                                                                    | Lung cancer                  |
| PMID16899777mgene19Sig14 | Metagene 19                                                                                                                                                                 | Lung cancer                  |
| PMID16899777mgene31Sig13 | Metagene 31                                                                                                                                                                 | Lung cancer                  |
| PMID16899777mgene35Sig5  | Metagene 35                                                                                                                                                                 | Lung cancer                  |
| PMID16899777mgene40Sig26 | Metagene 40                                                                                                                                                                 | Lung cancer                  |
| PMID16899777mgene41Sig16 | Metagene 41                                                                                                                                                                 | Lung cancer                  |
| PMID16899777mgene69Sig14 | Metagene 69                                                                                                                                                                 | Lung cancer                  |
| PMID16899777mgene74Sig11 | Metagene 74                                                                                                                                                                 | Lung cancer                  |
| PMID16899777mgene79Sig19 | Metagene 79                                                                                                                                                                 | Lung cancer                  |
| PMID16899777mgene86Sig15 | Metagene 86                                                                                                                                                                 | Lung cancer                  |
| PMID17194181Sig64        | 64-Gene Expression Signature                                                                                                                                                | Lung cancer                  |
| PMID17202451Sig16        | 16-Gene Signature                                                                                                                                                           | Lung cancer                  |
| PMID17202451Sig5         | Five-Gene Signature                                                                                                                                                         | Lung cancer                  |
| PMID18676831Sig6         | Six-Gene Lung Metastasis Signature                                                                                                                                          | Lung cancer                  |
| PMID20233996Sig3         | Three-Gene Signature of Lau et al for lung cancer prognosis                                                                                                                 | Lung cancer                  |
| PMID20233996Sig5         | Five-Gene Signature of Chen et al for lung cancer prognosis                                                                                                                 | Lung cancer                  |
| PMID12075054Sig17        | Poor prognosis signature in large-B-cell lymphoma                                                                                                                           | Lymphoma                     |
|                          | 120 Genes whose Expression Patterns Differed between Reactive Lymph Node Tissue and Three Types of SBCL: Follicular Lymphoma, Mantle Cell Lymphoma, and Chronic Lymphocytic |                              |
| PMID14961037Sig120       | Leukemia/Small Lymphocytic Lymphoma                                                                                                                                         | Lymphoma                     |
| PMID15115829Sig6         | Six-Gene Model                                                                                                                                                              | Lymphoma                     |
| PMID16760443Sig21        | c-myc and Target Genes                                                                                                                                                      | Lymphoma                     |
| PMID16760443Sig23        | NF-κB Target Genes                                                                                                                                                          | Lymphoma                     |
| PMID16760443Sig49        | Germinal-Center B-Cell Genes                                                                                                                                                | Lymphoma                     |
| PMID16760443Sig6         | MHC Class I Genes                                                                                                                                                           | Lymphoma                     |
| PMID12756227Sig79        | Genes expressed in mammosphere-derived cells only                                                                                                                           | Mammary stem cells           |
|                          | Transcriptome-Based Biomarker (TBB) that Predicts Long-Term Clinical Outcome in Patients with New-Onset Heart Failure                                                       | New-onset heart failure (HF) |
| PMID18591436Sig45        | Genes Found Differentially Expressed in HPV-Positive SCCHN versus Normal Oral Epithelium                                                                                    | Oral cancer                  |
| PMID17079134Sig38        | Genes Found Differentially Expressed in HPV-Negative SCCHN versus Normal Oral Epithelium                                                                                    | Oral cancer                  |
| PMID17079134Sig39        | Pancreatic Carcinoma Metastasis                                                                                                                                             | Pancreatic cancer            |
| PMID15643601Sig11        | Cohort of Cross-Validated Genes Identified by Meta-Analysis of Prostate Cancer Gene Expression Profiles                                                                     | Prostate cancer              |
| PMID12154050Sig80        | Recurrent Human Prostate Tumors                                                                                                                                             | Prostate cancer              |
| PMID15067324Sig218       | Polycomb Repression Signature                                                                                                                                               | Prostate cancer              |
| PMID18006806Sig14        | 87-Gene TMPRSS2–ERG Signature                                                                                                                                               | Prostate cancer              |
| PMID18505969Sig87        | 17 Gene/Probe Model                                                                                                                                                         | Prostate cancer              |
| PMID18846227Sig17        | Renal Cell Carcinomas                                                                                                                                                       | Renal cancer                 |

|                    |                                                                                                       |                      |
|--------------------|-------------------------------------------------------------------------------------------------------|----------------------|
| PMID12469122Sig17  | 17-Gene Signature Associated with Metastasis                                                          | Solid tumor          |
| PMID19658182Sig61  | Sixty-One Genes Differentially Expressed Between Benign, Borderline, and/or Malignant Thyroid Lesions | Thyroid cancer       |
| PMID14527998Sig249 | Normal Old Cells and Werner Syndrome Cells                                                            | Werner syndrome (WS) |

---

**Table S2. List of validation datasets in breast cancer**

| <b>PubMed</b>            | <b>Datasets</b>            | <b>Total probe number</b> | <b>Total sample number</b> | <b>Clinical endpoints</b> | <b>N/A rate</b> | <b>Differential index</b> |
|--------------------------|----------------------------|---------------------------|----------------------------|---------------------------|-----------------|---------------------------|
| <a href="#">21501481</a> | <b>GSE20685</b>            | 54619                     | 327                        | OS                        | 0%              | 76%                       |
| <a href="#">16141321</a> | <b>BR1128</b>              | 22215                     | 249                        | DSS                       | 0%              | 66%                       |
| <a href="#">18593943</a> | <b>GSE11121</b>            | 22215                     | 200                        | DMFS                      | 0%              | 65%                       |
| <a href="#">20490655</a> | <b>GSE21653</b>            | 54613                     | 266                        | DFS                       | 0%              | 61%                       |
| <a href="#">17079448</a> | <b>BR1095</b>              | 22215                     | 289                        | DFS                       | 0%              | 60%                       |
| <a href="#">17079448</a> | <b>BR1414</b>              | 22215                     | 147                        | RFS, DFS                  | 0%              | 54%                       |
| <a href="#">22522925</a> | <b>BRMetabricV22522925</b> | 48803                     | 995                        | DSS, OS                   | 0%              | 53%                       |
| <a href="#">22522925</a> | <b>BRMetabricD22522925</b> | 48803                     | 997                        | DSS, OS                   | 0%              | 53%                       |
| <a href="#">15721472</a> | <b>BR1405</b>              | 23255                     | 286                        | RFS                       | 0%              | 48%                       |
| <a href="#">21558518</a> | <b>GSE25055</b>            | 22215                     | 310                        | DMFS                      | 0%              | 46%                       |
| <a href="#">16505416</a> | <b>BR1224</b>              | 20024                     | 40                         | RFS                       | 0%              | 43%                       |
| <a href="#">12490681</a> | <b>NKI295 BR2411</b>       | 24481                     | 295                        | RFS, DFS, DMFS            | 0%              | 43%                       |
| <a href="#">18498629</a> | <b>BR1141</b>              | 22215                     | 275                        | RFS, DMFS                 | 0%              | 40%                       |
| <a href="#">11823860</a> | <b>BR544</b>               | 19517                     | 97                         | DMFS                      | 0%              | 39%                       |
| <a href="#">17545524</a> | <b>GSE7390</b>             | 22215                     | 198                        | RFS,DMFS,OS               | 0%              | 36%                       |
| <a href="#">21558518</a> | <b>GSE25065</b>            | 22215                     | 198                        | DMFS                      | 0%              | 34%                       |
| <a href="#">16643655</a> | <b>BR1552</b>              | 22575                     | 69                         | RFS                       | 2%              | 32%                       |
| <a href="#">19204204</a> | <b>GSE10886</b>            | 20835                     | 197                        | RFS,OS                    | 0%              | 30%                       |
| <a href="#">20697068</a> | <b>GSE17705</b>            | 22215                     | 298                        | DMFS                      | 0%              | 28%                       |
| <a href="#">16626501</a> | <b>GSE2607GPL887</b>       | 20024                     | 50                         | RFS, OS                   | 0%              | 17%                       |
| <a href="#">16478745</a> | <b>BR1042</b>              | 22215                     | 172                        | RFS                       | 0%              | 15%                       |
| <a href="#">21115855</a> | <b>GSE20624</b>            | 20835                     | 293                        | RFS                       | 0%              | 9%                        |
| <a href="#">18347175</a> | <b>BR18347175</b>          | 21521                     | 155                        | RFS, DFS                  | 0%              | 6%                        |
| <a href="#">20813035</a> | <b>GSE18229</b>            | 20835                     | 199                        | RFS, OS                   | 4%              | 4%                        |
| <a href="#">18592372</a> | GSE10510                   | 26581                     | 148                        | OS, DFS                   | 38%             | 1%                        |
| <a href="#">17663798</a> | BR17663798                 | 22575                     | 191                        | RFS,DFS                   | 42%             | -1%                       |
| <a href="#">20098429</a> | GSE16446                   | 54613                     | 120                        | DMFS, OS                  | 0%              | -1%                       |
| <a href="#">16626501</a> | GSE2607GPL1390             | 20835                     | 64                         | RFS, OS                   | 68%             | -3%                       |
| <a href="#">18782450</a> | BR907                      | 20024                     | 94                         | RFS, DFS                  | 56%             | -3%                       |
| <a href="#">19435916</a> | GSE10885                   | 20835                     | 119                        | RFS, OS                   | 4%              | -15%                      |
| <a href="#">20932292</a> | GSE17907                   | 24577                     | 55                         | DMFS                      | 0%              | -19%                      |

**Table S3. Identification of prognostic signature candidates in breast cancer**

| <b>Signature ID</b> | <b>%<br/>Significant<br/>p values</b> | <b>Signature description</b>                                                                               |
|---------------------|---------------------------------------|------------------------------------------------------------------------------------------------------------|
| PMID23383020BRmet50 | 74%                                   | A meta-signature in breast cancer for poor prognosis prediction                                            |
| PMID18271932Sig33   | 68%                                   | Predictor Gene Set for TP53 Status                                                                         |
| PMID18360352Sig21   | 65%                                   | Oncotype DX Breast Cancer Assay                                                                            |
| PMID18662380Sig355  | 65%                                   | (Proliferation) AURKA Coexpression Module                                                                  |
| PMID18231641Sig73   | 61%                                   | 73-Gene Outcome Signature                                                                                  |
| PMID16626501Sig53   | 61%                                   | 53 Classifier Genes                                                                                        |
| PMID15899795Sig50   | 61%                                   | Breast cancer cell proliferation signature                                                                 |
| PMID16280042Sig64   | 58%                                   | 64-Gene Set                                                                                                |
| PMID17885619Sig143  | 58%                                   | Aromatase Inhibitor Letrozole Signature                                                                    |
| PMID18684329Sig127  | 58%                                   | Consensus Signature                                                                                        |
| PMID18425577Sig182  | 58%                                   | ER+/PR+ Signature                                                                                          |
| PMID15598354Sig90   | 58%                                   | 90-Gene Meta-Signature                                                                                     |
| PMID18498629Sig181  | 58%                                   | 181-Gene Classifier                                                                                        |
| PMID15721472Sig76   | 58%                                   | 76-Gene Prognostic Signature (for Development of Metastasis)                                               |
| PMID17150101Sig52   | 55%                                   | p53 Loss Signature                                                                                         |
| PMID20156340Sig229  | 55%                                   | ER+/HER2- Subtype Signature                                                                                |
| PMID18698033Sig229  | 55%                                   | AURKA (Proliferation) Module                                                                               |
| PMID18347175Sig36   | 55%                                   | 36-Gene PAM Signature                                                                                      |
| PMID18338247Sig736  | 55%                                   | Genes Expressed Differentially in Nonresponders Compared to Responders                                     |
| PMID12714683Sig29   | 55%                                   | Cluster of 29 Genes Showing Consistent Up-Regulation in IDC                                                |
| PMID11707567C1Sig25 | 55%                                   | Cluster C1 (Proliferation-Related Gene Expression)                                                         |
| PMID17160137Sig59   | 55%                                   | 59 RB (Retinoblastoma Tumor Suppressor) Target Genes                                                       |
| PMID17883867Sig60   | 52%                                   | 60-Gene Profile for recurrence                                                                             |
| PMID17079448Sig264  | 52%                                   | PAM 264-Gene Classifier                                                                                    |
| PMID17076897Sig52   | 52%                                   | Consensus Prognostic Gene Expression Classifier for ER-Positive (+) Breast Cancer                          |
| PMID12714683Sig85   | 52%                                   | 85 Genes with Increased Expression in IDC                                                                  |
| PMID20368555Sig1022 | 52%                                   | GSE3494 ER Predictor Gene List                                                                             |
| PMID19723662Sig12   | 52%                                   | Probesets Used for Molecular Subtype Assignment                                                            |
| PMID19225562Sig485  | 52%                                   | LCM-dissected breast cancer signatures                                                                     |
| PMID16491069Sig45   | 52%                                   | Breast Cancer Proliferation Cluster                                                                        |
| PMID16505416Sig822  | 52%                                   | Estrogen-SAM List                                                                                          |
| PMID21501481Sig18   | 52%                                   | Cell Cycle and Proliferation Signature                                                                     |
| PMID19014521Sig72   | 52%                                   | Cancer proliferation gene set                                                                              |
| PMID21501481Sig224  | 52%                                   | Wound Response Signature                                                                                   |
| PMID11823860Sig70   | 52%                                   | MammaPrint for metastasis prediction                                                                       |
| PMID18593943Sig117  | 52%                                   | Estrogen Receptor (Luminal) Cluster                                                                        |
| PMID16091131Sig31   | 52%                                   | Preoperative Systemic Chemotherapy (PST) with Epirubicin/Cyclophosphamide (EC) Favorable Outcome Signature |

**Table S4. Annotation of genes in BRmet50.**

| Gene<br>Symbol | Expression<br>in Cancer | Role<br>in Cancer           | Function<br>Category                  |
|----------------|-------------------------|-----------------------------|---------------------------------------|
| UBE2C          | Up <sup>1, 2</sup>      | Progression <sup>1, 2</sup> | Cell Cycle                            |
| KIF2C          | Up <sup>3</sup>         | Progression <sup>4</sup>    | Cell Cycle                            |
| TACC3          | Up <sup>5</sup>         | Progression <sup>5</sup>    | Cell Cycle                            |
| MAD2L1         | Up <sup>6</sup>         | Progression <sup>6</sup>    | Cell Cycle                            |
| AURKA          | Up <sup>7</sup>         | Progression <sup>7</sup>    | Cell Cycle                            |
| CEP55          | Up <sup>8</sup>         | Progression <sup>9</sup>    | Cell Cycle                            |
| CCNB1          | Up <sup>10</sup>        | Progression <sup>11</sup>   | Cell Cycle                            |
| RRM2           | Up <sup>12, 13</sup>    | Progression <sup>14</sup>   | Cell Cycle                            |
| DLGAP5         | Up <sup>15</sup>        | Progression <sup>15</sup>   | Cell Cycle                            |
| NEK2           | Up <sup>16</sup>        | Progression <sup>17</sup>   | Cell Cycle                            |
| NDC80          | Up <sup>18</sup>        | NA*                         | Cell Cycle                            |
| UBE2S          | Up <sup>19</sup>        | NA                          | Cell Cycle                            |
| CCNB2          | Up <sup>20</sup>        | NA                          | Cell Cycle                            |
| KIF20A         | Up <sup>21</sup>        | NA                          | Cell Cycle                            |
| TRIP13         | Up <sup>22</sup>        | NA                          | Cell Cycle                            |
| CDKN3          | Up <sup>23</sup>        | NA                          | Cell Cycle                            |
| RAD51          | Up <sup>24</sup>        | Progression <sup>24</sup>   | DNA Replication                       |
| KPNA2          | Up <sup>25</sup>        | Progression <sup>25</sup>   | DNA Replication                       |
| TYMS           | Up <sup>26</sup>        | NA                          | DNA Replication                       |
| CDT1           | Up <sup>27</sup>        | NA                          | DNA Replication                       |
| FEN1           | Up <sup>28</sup>        | NA                          | DNA Replication                       |
| RFC4           | Up <sup>29</sup>        | NA                          | DNA Replication                       |
| EZH2           | Up <sup>30</sup>        | Progression <sup>30</sup>   | Proliferation                         |
| DDX39          | Up <sup>31</sup>        | Progression <sup>31</sup>   | Proliferation                         |
| GTPBP4         | Down <sup>32</sup>      | Suppressor <sup>32</sup>    | Proliferation                         |
| CCT5           | Up <sup>33</sup>        | NA                          | Protein Folding                       |
| HJURP          | NA                      | NA                          | Cell Cycle                            |
| SPAG5          | NA                      | NA                          | Cell Cycle                            |
| KIF4A          | NA                      | NA                          | Cell Cycle                            |
| PRC1           | NA                      | NA                          | Cell Cycle                            |
| KIF23          | NA                      | NA                          | Cell Cycle                            |
| NUSAP1         | NA                      | NA                          | Cell Cycle                            |
| CENPN          | NA                      | NA                          | Cell Cycle                            |
| LRP8           | NA                      | NA                          | Cell Movement                         |
| GMPS           | NA                      | NA                          | DNA Replication                       |
| MCM10          | NA                      | NA                          | DNA Replication                       |
| CDC45L         | NA                      | NA                          | DNA Replication                       |
| GARS           | NA                      | NA                          | Proliferation                         |
| C1orf106       | NA                      | NA                          | NA                                    |
| BTG2           | Down <sup>34</sup>      | Suppressor <sup>34</sup>    | Anti-Proliferation                    |
| SCUBE2         | Down <sup>35</sup>      | Suppressor <sup>35</sup>    | Anti-Proliferation                    |
| OGN            | Down <sup>36</sup>      | NA                          | Cellular Assembly<br>Thioredoxin Fold |
| SH3BGRL        | Down <sup>37</sup>      | NA                          | Proteins                              |
| COL14A1        | NA                      | NA                          | Cellular Assembly                     |
| SPARCL1        | NA                      | NA                          | Cellular Assembly                     |

|         |    |    |                                  |
|---------|----|----|----------------------------------|
| RAI2    | NA | NA | Proliferation                    |
| KIF13B  | NA | NA | Cell Movement                    |
| QDPR    | NA | NA | Amino Acid and<br>Oxidation      |
| ALDH3A2 | NA | NA | Lipid Oxidoreductase<br>Activity |
| CIRBP   | NA | NA | mRNA Stabilization               |

---

\*Up for up-regulation; Down for down-regulation; NA for not available.

Meta-direction: concordant expression direction of the BRmet50 genes.

|

**Table S5. Annotation of genes in PMID18271932Sig33**

| <b>Gene<br/>Symbol</b> | <b>Expression<br/>in Cancer</b> | <b>Role<br/>in Cancer</b>          | <b>Function<br/>Category</b>        |
|------------------------|---------------------------------|------------------------------------|-------------------------------------|
| <u>CCNB2</u> *         | Up <sup>38</sup>                | Oncogene <sup>38</sup>             | Cell cycle<br>DNA                   |
| <u>CDC45</u>           | Up <sup>39</sup>                | Growth <sup>39</sup>               | replication                         |
| <u>CEP55</u>           | Up <sup>8</sup>                 | Antigen <sup>8</sup>               | Cell cycle                          |
| <u>KIF23</u>           | Up <sup>40</sup>                | Growth <sup>40</sup>               | Cell cycle                          |
| <u>KIF2C</u>           | UP <sup>41</sup>                | Progression <sup>41</sup>          | Cell cycle                          |
| <u>PRC1</u>            | Up <sup>42</sup>                | Progression <sup>42</sup>          | Cell cycle                          |
| <u>UBE2C</u>           | Up <sup>43</sup>                | Progression <sup>44</sup>          | Ubiquitination                      |
| ASPM                   | Up <sup>45</sup>                | Progression <sup>45</sup>          | Cell cycle<br>B cell<br>development |
| BCL11A                 | Up <sup>46</sup>                | Oncogene <sup>46</sup>             |                                     |
| BIRC5                  | Up <sup>47</sup>                | Apoptosis inhibition <sup>47</sup> | Apoptosis                           |
| CDCA8                  | Up <sup>48</sup>                | Growth <sup>48</sup>               | Cell cycle                          |
| CENPF                  | Up <sup>49</sup>                | Oncogene <sup>50</sup>             | Cell cycle                          |
| HEXIM1                 | Up <sup>51</sup>                | Progression <sup>51</sup>          | Cell cycle                          |
| MAPRE1                 | Up <sup>52</sup>                | Oncogene <sup>52</sup>             | Cell cycle                          |
| PLK1                   | Up <sup>53</sup>                | Progression <sup>53</sup>          | Cell cycle                          |
| PTP4A2                 | Up <sup>54</sup>                | Oncogene <sup>54</sup> Up          | Proliferation                       |
| PTTG1                  | Up <sup>55</sup>                | Oncogene <sup>55</sup>             | Cell cycle<br>Cellular<br>Assembly  |
| STMN1                  | Up <sup>56</sup>                | Progression <sup>57</sup>          | Cell<br>movement                    |
| SULF2                  | Up <sup>58</sup>                | Progression <sup>58</sup>          |                                     |
| UBE2T                  | Up <sup>59</sup>                | Progression <sup>60</sup>          | Ubiquitination                      |
| CENPE                  | Down <sup>61</sup>              | Growth <sup>61</sup>               | Cell cycle<br>DNA<br>replication    |
| LIN9                   | Down <sup>62</sup>              | Suppressor <sup>62</sup>           |                                     |
| RPS27L                 | Down <sup>63</sup>              | Growth <sup>64</sup>               | Apoptosis                           |
| TMEM25                 | Down <sup>65</sup>              | Biomarker <sup>65</sup>            | NA                                  |
| C15orf42               | NA                              | NA                                 | NA                                  |
| C3orf18                | NA                              | NA                                 | NA                                  |
| FAM63A                 | NA                              | NA                                 | NA                                  |
| FANCI                  | NA                              | NA                                 | DNA repair                          |
| MKNK2                  | NA                              | NA                                 | Proliferation                       |
| MUTYH                  | NA                              | NA                                 | DNA repair                          |
| PKMYT1                 | NA                              | NA                                 | Cell cycle                          |
| RILPL2                 | NA                              | NA                                 | NA                                  |

\* Seven common gene symbols between BRmet50 and PMID18271932Sig33 are underlined.



**Table S6. TP53, ER, PR, and HER2 statuses in TCGA tumor samples.**

| <b>TCGA<br/>Sample ID</b> | <b>TP53<br/>Mutation</b> | <b>TP53<br/>Color</b> | <b>ER</b> | <b>PR</b> | <b>HER2</b> | <b>SUBTYPE</b> | <b>SUBTYPE<br/>Color</b> |
|---------------------------|--------------------------|-----------------------|-----------|-----------|-------------|----------------|--------------------------|
| TCGA-AC-A23C              | R174fs                   | RED                   | Positive  | Positive  | Positive    | ER/HER2        | PURPLE                   |
| TCGA-E2-A15E              | H193R                    | RED                   | Positive  | Positive  | Positive    | ER/HER2        | PURPLE                   |
| TCGA-E9-A1N5              | H193R                    | RED                   | Positive  | Positive  | Positive    | ER/HER2        | PURPLE                   |
| TCGA-A2-A0EY              | Y234C                    | RED                   | Positive  | Negative  | Positive    | ER/HER2        | PURPLE                   |
| TCGA-D8-A1X5              | C238F                    | RED                   | Positive  | Positive  | Positive    | ER/HER2        | PURPLE                   |
| TCGA-D8-A1XA              | R306*                    | RED                   | Positive  | Positive  | Equivocal   | ER/HER2        | PURPLE                   |
| TCGA-BH-A1FE              | N247I                    | RED                   | Positive  | Positive  | NA          | ER/HER2        | PURPLE                   |
| TCGA-BH-A18H              | Q331*                    | RED                   | Positive  | Positive  | Positive    | ER/HER2        | PURPLE                   |
| TCGA-A8-A08H              | WT                       | WHITE                 | Positive  | Positive  | Positive    | ER/HER2        | PURPLE                   |
| TCGA-A8-A07P              | WT                       | WHITE                 | Positive  | Positive  | Positive    | ER/HER2        | PURPLE                   |
| TCGA-D8-A140              | WT                       | WHITE                 | Positive  | Positive  | Positive    | ER/HER2        | PURPLE                   |
| TCGA-GM-A2DA              | WT                       | WHITE                 | Positive  | Positive  | Positive    | ER/HER2        | PURPLE                   |
| TCGA-B6-A0WZ              | WT                       | WHITE                 | Positive  | Positive  | NA          | ER/HER2        | PURPLE                   |
| TCGA-B6-A0IP              | WT                       | WHITE                 | Positive  | Positive  | NA          | ER/HER2        | PURPLE                   |
| TCGA-AQ-A1H2              | WT                       | WHITE                 | Positive  | Positive  | Positive    | ER/HER2        | PURPLE                   |
| TCGA-A8-A099              | WT                       | WHITE                 | Positive  | Positive  | Positive    | ER/HER2        | PURPLE                   |
| TCGA-A8-A08C              | WT                       | WHITE                 | Positive  | Positive  | Positive    | ER/HER2        | PURPLE                   |
| TCGA-B6-A0IC              | WT                       | WHITE                 | Positive  | Positive  | NA          | ER/HER2        | PURPLE                   |
| TCGA-C8-A133              | WT                       | WHITE                 | Positive  | Positive  | NA          | ER/HER2        | PURPLE                   |
| TCGA-B6-A0X4              | WT                       | WHITE                 | Positive  | Positive  | NA          | ER/HER2        | PURPLE                   |
| TCGA-B6-A0WS              | WT                       | WHITE                 | Positive  | Positive  | NA          | ER/HER2        | PURPLE                   |
| TCGA-AR-A1AX              | WT                       | WHITE                 | Positive  | Positive  | Positive    | ER/HER2        | PURPLE                   |
| TCGA-A8-A0AB              | WT                       | WHITE                 | Positive  | Positive  | Positive    | ER/HER2        | PURPLE                   |
| TCGA-C8-A132              | WT                       | WHITE                 | Positive  | Positive  | NA          | ER/HER2        | PURPLE                   |
| TCGA-B6-A0WT              | WT                       | WHITE                 | Positive  | Positive  | NA          | ER/HER2        | PURPLE                   |
| TCGA-BH-A18I              | WT                       | WHITE                 | Positive  | Positive  | Positive    | ER/HER2        | PURPLE                   |
| TCGA-BH-A18M              | WT                       | WHITE                 | Positive  | Positive  | Positive    | ER/HER2        | PURPLE                   |
| TCGA-B6-A0IH              | WT                       | WHITE                 | Positive  | Positive  | NA          | ER/HER2        | PURPLE                   |
| TCGA-A8-A08T              | WT                       | WHITE                 | Positive  | Positive  | Positive    | ER/HER2        | PURPLE                   |
| TCGA-AN-A0FK              | WT                       | WHITE                 | Positive  | Positive  | Positive    | ER/HER2        | PURPLE                   |
| TCGA-E2-A1B1              | WT                       | WHITE                 | Positive  | Positive  | Positive    | ER/HER2        | PURPLE                   |
| TCGA-E2-A1IH              | WT                       | WHITE                 | Positive  | Positive  | Equivocal   | ER/HER2        | PURPLE                   |
| TCGA-D8-A1JB              | WT                       | WHITE                 | Positive  | Positive  | Positive    | ER/HER2        | PURPLE                   |
| TCGA-AN-A041              | WT                       | WHITE                 | Positive  | Negative  | Positive    | ER/HER2        | PURPLE                   |
| TCGA-AN-A03X              | WT                       | WHITE                 | Positive  | Positive  | Positive    | ER/HER2        | PURPLE                   |
| TCGA-E9-A22E              | WT                       | WHITE                 | Positive  | Positive  | Positive    | ER/HER2        | PURPLE                   |
| TCGA-B6-A0I5              | WT                       | WHITE                 | Positive  | Positive  | NA          | ER/HER2        | PURPLE                   |
| TCGA-B6-A0X0              | WT                       | WHITE                 | Positive  | Positive  | NA          | ER/HER2        | PURPLE                   |
| TCGA-A8-A08S              | WT                       | WHITE                 | Positive  | Positive  | Positive    | ER/HER2        | PURPLE                   |
| TCGA-AN-A0XP              | WT                       | WHITE                 | Positive  | Positive  | Positive    | ER/HER2        | PURPLE                   |
| TCGA-BH-A1FL              | WT                       | WHITE                 | Positive  | Positive  | NA          | ER/HER2        | PURPLE                   |
| TCGA-A7-A26H              | WT                       | WHITE                 | Positive  | Negative  | Positive    | ER/HER2        | PURPLE                   |
| TCGA-AN-A0FS              | WT                       | WHITE                 | Positive  | Negative  | Positive    | ER/HER2        | PURPLE                   |

|              |             |       |          |          |           |         |        |
|--------------|-------------|-------|----------|----------|-----------|---------|--------|
| TCGA-BH-A1FR | WT          | WHITE | Positive | Positive | NA        | ER/HER2 | PURPLE |
| TCGA-B6-A0RV | WT          | WHITE | Positive | Positive | NA        | ER/HER2 | PURPLE |
| TCGA-E9-A295 | WT          | WHITE | Positive | Positive | Positive  | ER/HER2 | PURPLE |
| TCGA-A8-A06T | WT          | WHITE | Positive | Positive | Positive  | ER/HER2 | PURPLE |
| TCGA-B6-A0RP | WT          | WHITE | Positive | Positive | NA        | ER/HER2 | PURPLE |
| TCGA-C8-A1HE | WT          | WHITE | Positive | Positive | Equivocal | ER/HER2 | PURPLE |
| TCGA-BH-A0BQ | WT          | WHITE | Positive | Positive | Positive  | ER/HER2 | PURPLE |
| TCGA-B6-A0X7 | WT          | WHITE | Positive | Positive | NA        | ER/HER2 | PURPLE |
| TCGA-AN-A0FN | WT          | WHITE | Positive | Positive | Positive  | ER/HER2 | PURPLE |
| TCGA-AC-A23G | WT          | WHITE | Positive | Positive | Positive  | ER/HER2 | PURPLE |
| TCGA-B6-A0RO | WT          | WHITE | Positive | Positive | NA        | ER/HER2 | PURPLE |
| TCGA-E9-A1N4 | WT          | WHITE | Positive | Positive | Positive  | ER/HER2 | PURPLE |
| TCGA-A2-A0SY | WT          | WHITE | Positive | Positive | Positive  | ER/HER2 | PURPLE |
| TCGA-AC-A2FB | WT          | WHITE | Positive | Positive | Positive  | ER/HER2 | PURPLE |
| TCGA-D8-A1XY | WT          | WHITE | Positive | Positive | Positive  | ER/HER2 | PURPLE |
| TCGA-BH-A0B6 | WT          | WHITE | Positive | Positive | Positive  | ER/HER2 | PURPLE |
| TCGA-AC-A23E | WT          | WHITE | Positive | Positive | NA        | ER/HER2 | PURPLE |
| TCGA-E2-A3DX | WT          | WHITE | Positive | Positive | Positive  | ER/HER2 | PURPLE |
| TCGA-AQ-A0Y5 | WT          | WHITE | Positive | Positive | Positive  | ER/HER2 | PURPLE |
| TCGA-B6-A0RQ | WT          | WHITE | Positive | Positive | NA        | ER/HER2 | PURPLE |
| TCGA-BH-A0W5 | WT          | WHITE | Positive | Positive | Equivocal | ER/HER2 | PURPLE |
| TCGA-AR-A1AW | R273C       | RED   | Positive | Positive | Negative  | ER      | GREEN  |
| TCGA-E9-A1NF | F113C       | RED   | Positive | Positive | Negative  | ER      | GREEN  |
| TCGA-BH-A0C3 | G187S       | RED   | Positive | Negative | Negative  | ER      | GREEN  |
| TCGA-AN-A046 | E11K        | RED   | Positive | Positive | Negative  | ER      | GREEN  |
| TCGA-BH-A1EY | Y126C       | RED   | Positive | Positive | Negative  | ER      | GREEN  |
| TCGA-AR-A1AN | R110fs      | RED   | Positive | Positive | Negative  | ER      | GREEN  |
| TCGA-BH-A0B0 | R175H       | RED   | Positive | Positive | Negative  | ER      | GREEN  |
| TCGA-A7-A3RF | R273H       | RED   | Positive | Positive | Negative  | ER      | GREEN  |
| TCGA-BH-A0BT | R158G       | RED   | Positive | Positive | Negative  | ER      | GREEN  |
| TCGA-AR-A1AS | R175H       | RED   | Positive | Positive | Negative  | ER      | GREEN  |
| TCGA-BH-A0BC | R248W       | RED   | Positive | Positive | Negative  | ER      | GREEN  |
| TCGA-AR-A1AP | R196*       | RED   | Positive | Positive | Negative  | ER      | GREEN  |
| TCGA-E2-A108 | R273H       | RED   | Positive | Positive | Negative  | ER      | GREEN  |
| TCGA-AN-A0AS | R110del     | RED   | Positive | Negative | Negative  | ER      | GREEN  |
| TCGA-AR-A24T | R273H       | RED   | Positive | Positive | Negative  | ER      | GREEN  |
| TCGA-E2-A1IN | V157G       | RED   | Positive | Positive | Negative  | ER      | GREEN  |
| TCGA-AN-A0XT | Y126_splice | RED   | Positive | Negative | Negative  | ER      | GREEN  |
| TCGA-BH-A0BP | K132N       | RED   | Positive | Positive | Negative  | ER      | GREEN  |
| TCGA-E2-A1IO | P190fs      | RED   | Positive | Positive | Negative  | ER      | GREEN  |
| TCGA-BH-A0DI | I255N       | RED   | Positive | Positive | Negative  | ER      | GREEN  |
| TCGA-D8-A1XR | WT          | WHITE | Positive | Positive | Negative  | ER      | GREEN  |
| TCGA-BH-A0C1 | WT          | WHITE | Positive | Positive | Negative  | ER      | GREEN  |
| TCGA-A8-A07F | WT          | WHITE | Positive | Positive | Negative  | ER      | GREEN  |
| TCGA-E2-A15L | WT          | WHITE | Positive | Positive | Negative  | ER      | GREEN  |
| TCGA-BH-A0DG | WT          | WHITE | Positive | Negative | Negative  | ER      | GREEN  |
| TCGA-EW-A1J1 | WT          | WHITE | Positive | Positive | Negative  | ER      | GREEN  |
| TCGA-AR-A24O | WT          | WHITE | Positive | Positive | Negative  | ER      | GREEN  |

|              |    |       |          |          |          |    |       |
|--------------|----|-------|----------|----------|----------|----|-------|
| TCGA-BH-A1ET | WT | WHITE | Positive | Positive | Negative | ER | GREEN |
| TCGA-AO-A12B | WT | WHITE | Positive | Positive | Negative | ER | GREEN |
| TCGA-D8-A1JI | WT | WHITE | Positive | Positive | Negative | ER | GREEN |
| TCGA-GM-A2DC | WT | WHITE | Positive | Positive | Negative | ER | GREEN |
| TCGA-C8-A12M | WT | WHITE | Positive | Negative | Negative | ER | GREEN |
| TCGA-A8-A06Y | WT | WHITE | Positive | Positive | Negative | ER | GREEN |
| TCGA-AC-A2QI | WT | WHITE | Positive | Negative | Negative | ER | GREEN |
| TCGA-AN-A0XO | WT | WHITE | Positive | Negative | Negative | ER | GREEN |
| TCGA-EW-A1PE | WT | WHITE | Positive | Positive | Negative | ER | GREEN |
| TCGA-E2-A156 | WT | WHITE | Positive | Positive | Negative | ER | GREEN |
| TCGA-AO-A12H | WT | WHITE | Positive | Positive | Negative | ER | GREEN |
| TCGA-BH-A0DX | WT | WHITE | Positive | Positive | Negative | ER | GREEN |
| TCGA-A1-A0SQ | WT | WHITE | Positive | Positive | Negative | ER | GREEN |
| TCGA-D8-A1JN | WT | WHITE | Positive | Positive | Negative | ER | GREEN |
| TCGA-BH-A0DO | WT | WHITE | Positive | Positive | Negative | ER | GREEN |
| TCGA-E2-A15I | WT | WHITE | Positive | Positive | Negative | ER | GREEN |
| TCGA-BH-A18N | WT | WHITE | Positive | Positive | Negative | ER | GREEN |
| TCGA-A8-A083 | WT | WHITE | Positive | Positive | Negative | ER | GREEN |
| TCGA-BH-A18S | WT | WHITE | Positive | Positive | Negative | ER | GREEN |
| TCGA-A7-A13G | WT | WHITE | Positive | Positive | Negative | ER | GREEN |
| TCGA-AO-A0J8 | WT | WHITE | Positive | Positive | Negative | ER | GREEN |
| TCGA-D8-A1JS | WT | WHITE | Positive | Positive | Negative | ER | GREEN |
| TCGA-BH-A0HI | WT | WHITE | Positive | Positive | Negative | ER | GREEN |
| TCGA-E2-A15G | WT | WHITE | Positive | Positive | Negative | ER | GREEN |
| TCGA-D8-A27E | WT | WHITE | Positive | Positive | Negative | ER | GREEN |
| TCGA-BH-A0DS | WT | WHITE | Positive | Positive | Negative | ER | GREEN |
| TCGA-E2-A1IK | WT | WHITE | Positive | Positive | Negative | ER | GREEN |
| TCGA-E2-A1IU | WT | WHITE | Positive | Positive | Negative | ER | GREEN |
| TCGA-BH-A0HO | WT | WHITE | Positive | Positive | Negative | ER | GREEN |
| TCGA-D8-A27P | WT | WHITE | Positive | Positive | Negative | ER | GREEN |
| TCGA-D8-A1XC | WT | WHITE | Positive | Positive | Negative | ER | GREEN |
| TCGA-AO-A0JC | WT | WHITE | Positive | Positive | Negative | ER | GREEN |
| TCGA-A1-A0SB | WT | WHITE | Positive | Negative | Negative | ER | GREEN |
| TCGA-AO-A1KO | WT | WHITE | Positive | Positive | Negative | ER | GREEN |
| TCGA-A2-A0YC | WT | WHITE | Positive | Positive | Negative | ER | GREEN |
| TCGA-BH-A1ES | WT | WHITE | Positive | Positive | Negative | ER | GREEN |
| TCGA-AO-A126 | WT | WHITE | Positive | Positive | Negative | ER | GREEN |
| TCGA-E2-A15K | WT | WHITE | Positive | Positive | Negative | ER | GREEN |
| TCGA-EW-A1P6 | WT | WHITE | Positive | Positive | Negative | ER | GREEN |
| TCGA-A8-A0A4 | WT | WHITE | Positive | Positive | Negative | ER | GREEN |
| TCGA-AR-A1AU | WT | WHITE | Positive | Positive | Negative | ER | GREEN |
| TCGA-EW-A1J5 | WT | WHITE | Positive | Positive | Negative | ER | GREEN |
| TCGA-EW-A1P0 | WT | WHITE | Positive | Negative | Negative | ER | GREEN |
| TCGA-AN-A0FF | WT | WHITE | Positive | Positive | Negative | ER | GREEN |
| TCGA-A1-A0SE | WT | WHITE | Positive | Positive | Negative | ER | GREEN |
| TCGA-A8-A09K | WT | WHITE | Positive | Positive | Negative | ER | GREEN |
| TCGA-EW-A1P3 | WT | WHITE | Positive | Positive | Negative | ER | GREEN |
| TCGA-A7-A3IZ | WT | WHITE | Positive | Negative | Negative | ER | GREEN |

|              |    |       |          |               |          |    |       |
|--------------|----|-------|----------|---------------|----------|----|-------|
| TCGA-AR-A2LL | WT | WHITE | Positive | Positive      | Negative | ER | GREEN |
| TCGA-BH-A0HW | WT | WHITE | Positive | Negative      | Negative | ER | GREEN |
| TCGA-A8-A08O | WT | WHITE | Positive | Positive      | Negative | ER | GREEN |
| TCGA-A8-A0A9 | WT | WHITE | Positive | Positive      | Negative | ER | GREEN |
| TCGA-E2-A15F | WT | WHITE | Positive | Positive      | Negative | ER | GREEN |
| TCGA-D8-A1X7 | WT | WHITE | Positive | Positive      | Negative | ER | GREEN |
| TCGA-AO-A0JI | WT | WHITE | Positive | Negative      | Negative | ER | GREEN |
| TCGA-E9-A1R2 | WT | WHITE | Positive | Negative      | Negative | ER | GREEN |
| TCGA-A8-A06N | WT | WHITE | Positive | Negative      | Negative | ER | GREEN |
| TCGA-BH-A1F5 | WT | WHITE | Positive | Positive      | Negative | ER | GREEN |
| TCGA-D8-A1X8 | WT | WHITE | Positive | Indeterminate | Negative | ER | GREEN |
| TCGA-A8-A0A2 | WT | WHITE | Positive | Positive      | Negative | ER | GREEN |
| TCGA-BH-A0DE | WT | WHITE | Positive | Positive      | Negative | ER | GREEN |
| TCGA-AO-A12G | WT | WHITE | Positive | Positive      | Negative | ER | GREEN |
| TCGA-BH-A0AY | WT | WHITE | Positive | Positive      | Negative | ER | GREEN |
| TCGA-A2-A0T7 | WT | WHITE | Positive | Positive      | Negative | ER | GREEN |
| TCGA-BH-A0BF | WT | WHITE | Positive | Positive      | Negative | ER | GREEN |
| TCGA-BH-A18K | WT | WHITE | Positive | Positive      | Negative | ER | GREEN |
| TCGA-B6-A0IO | WT | WHITE | Positive | Indeterminate | NA       | ER | GREEN |
| TCGA-A1-A0SF | WT | WHITE | Positive | Positive      | Negative | ER | GREEN |
| TCGA-AR-A2LO | WT | WHITE | Positive | Positive      | Negative | ER | GREEN |
| TCGA-A2-A0YL | WT | WHITE | Positive | Positive      | Negative | ER | GREEN |
| TCGA-AO-A0J5 | WT | WHITE | Positive | Negative      | Negative | ER | GREEN |
| TCGA-BH-A0BV | WT | WHITE | Positive | Positive      | Negative | ER | GREEN |
| TCGA-AR-A1AV | WT | WHITE | Positive | Positive      | Negative | ER | GREEN |
| TCGA-AQ-A1H3 | WT | WHITE | Positive | Positive      | Negative | ER | GREEN |
| TCGA-D8-A27T | WT | WHITE | Positive | Positive      | Negative | ER | GREEN |
| TCGA-BH-A201 | WT | WHITE | Positive | Positive      | Negative | ER | GREEN |
| TCGA-A8-A08Z | WT | WHITE | Positive | Positive      | Negative | ER | GREEN |
| TCGA-AR-A24M | WT | WHITE | Positive | Positive      | Negative | ER | GREEN |
| TCGA-A8-A0A1 | WT | WHITE | Positive | Positive      | Negative | ER | GREEN |
| TCGA-D8-A1XB | WT | WHITE | Positive | Positive      | Negative | ER | GREEN |
| TCGA-BH-A18J | WT | WHITE | Positive | Positive      | Negative | ER | GREEN |
| TCGA-BH-A0BA | WT | WHITE | Positive | Positive      | Negative | ER | GREEN |
| TCGA-A8-A0A6 | WT | WHITE | Positive | Positive      | Negative | ER | GREEN |
| TCGA-BH-A0BJ | WT | WHITE | Positive | Positive      | Negative | ER | GREEN |
| TCGA-BH-A1EU | WT | WHITE | Positive | Positive      | Negative | ER | GREEN |
| TCGA-AN-A0XL | WT | WHITE | Positive | Positive      | Negative | ER | GREEN |
| TCGA-BH-A0DP | WT | WHITE | Positive | Positive      | Negative | ER | GREEN |
| TCGA-D8-A1XO | WT | WHITE | Positive | Positive      | Negative | ER | GREEN |
| TCGA-BH-A0E9 | WT | WHITE | Positive | Positive      | Negative | ER | GREEN |
| TCGA-A7-A26E | WT | WHITE | Positive | Positive      | Negative | ER | GREEN |
| TCGA-D8-A27V | WT | WHITE | Positive | Positive      | Negative | ER | GREEN |
| TCGA-AR-A252 | WT | WHITE | Positive | Positive      | Negative | ER | GREEN |
| TCGA-A2-A1FV | WT | WHITE | Positive | Positive      | Negative | ER | GREEN |
| TCGA-BH-A1EX | WT | WHITE | Positive | Positive      | Negative | ER | GREEN |
| TCGA-A1-A0SD | WT | WHITE | Positive | Positive      | Negative | ER | GREEN |
| TCGA-AC-A2B8 | WT | WHITE | Positive | Positive      | Negative | ER | GREEN |

|              |    |       |          |          |               |    |       |
|--------------|----|-------|----------|----------|---------------|----|-------|
| TCGA-BH-A1EO | WT | WHITE | Positive | Positive | Negative      | ER | GREEN |
| TCGA-C8-A1HI | WT | WHITE | Positive | Positive | Negative      | ER | GREEN |
| TCGA-BH-A0GZ | WT | WHITE | Positive | Positive | Negative      | ER | GREEN |
| TCGA-D8-A1X6 | WT | WHITE | Positive | Positive | Negative      | ER | GREEN |
| TCGA-AR-A1AK | WT | WHITE | Positive | Positive | Negative      | ER | GREEN |
| TCGA-A2-A0YD | WT | WHITE | Positive | Positive | Negative      | ER | GREEN |
| TCGA-E2-A10F | WT | WHITE | Positive | Positive | Negative      | ER | GREEN |
| TCGA-E2-A1L9 | WT | WHITE | Positive | Positive | Negative      | ER | GREEN |
| TCGA-D8-A1JE | WT | WHITE | Positive | Positive | Negative      | ER | GREEN |
| TCGA-E2-A10E | WT | WHITE | Positive | Positive | Negative      | ER | GREEN |
| TCGA-BH-A0H7 | WT | WHITE | Positive | Positive | Negative      | ER | GREEN |
| TCGA-AR-A24V | WT | WHITE | Positive | Positive | Negative      | ER | GREEN |
| TCGA-E9-A1NH | WT | WHITE | Positive | Positive | Negative      | ER | GREEN |
| TCGA-C8-A12N | WT | WHITE | Positive | Positive | Negative      | ER | GREEN |
| TCGA-A2-A0T5 | WT | WHITE | Positive | Positive | Negative      | ER | GREEN |
| TCGA-AR-A24X | WT | WHITE | Positive | Positive | Negative      | ER | GREEN |
| TCGA-AO-A12A | WT | WHITE | Positive | Positive | Negative      | ER | GREEN |
| TCGA-D8-A27K | WT | WHITE | Positive | Positive | Negative      | ER | GREEN |
| TCGA-BH-A0DT | WT | WHITE | Positive | Positive | Negative      | ER | GREEN |
| TCGA-BH-A28Q | WT | WHITE | Positive | Positive | Indeterminate | ER | GREEN |
| TCGA-A2-A0CQ | WT | WHITE | Positive | Positive | Negative      | ER | GREEN |
| TCGA-BH-A0DH | WT | WHITE | Positive | Positive | Negative      | ER | GREEN |
| TCGA-BH-A0HA | WT | WHITE | Positive | Positive | Negative      | ER | GREEN |
| TCGA-AO-A0J9 | WT | WHITE | Positive | Positive | Negative      | ER | GREEN |
| TCGA-BH-A0W7 | WT | WHITE | Positive | Positive | Negative      | ER | GREEN |
| TCGA-GM-A2DK | WT | WHITE | Positive | Negative | Negative      | ER | GREEN |
| TCGA-A8-A09T | WT | WHITE | Positive | Positive | Negative      | ER | GREEN |
| TCGA-EW-A1P5 | WT | WHITE | Positive | Positive | Negative      | ER | GREEN |
| TCGA-A7-A3IY | WT | WHITE | Positive | Positive | Negative      | ER | GREEN |
| TCGA-A2-A0SU | WT | WHITE | Positive | Positive | Negative      | ER | GREEN |
| TCGA-AO-A03P | WT | WHITE | Positive | Positive | Negative      | ER | GREEN |
| TCGA-A7-A0CD | WT | WHITE | Positive | Positive | Negative      | ER | GREEN |
| TCGA-EW-A10X | WT | WHITE | Positive | Positive | Negative      | ER | GREEN |
| TCGA-BH-A0BS | WT | WHITE | Positive | Positive | Negative      | ER | GREEN |
| TCGA-E2-A1L6 | WT | WHITE | Positive | Positive | Negative      | ER | GREEN |
| TCGA-D8-A1XV | WT | WHITE | Positive | Positive | Negative      | ER | GREEN |
| TCGA-A8-A093 | WT | WHITE | Positive | Positive | Negative      | ER | GREEN |
| TCGA-D8-A1XG | WT | WHITE | Positive | Negative | Negative      | ER | GREEN |
| TCGA-A8-A09V | WT | WHITE | Positive | Positive | Negative      | ER | GREEN |
| TCGA-A8-A096 | WT | WHITE | Positive | Positive | Negative      | ER | GREEN |
| TCGA-GM-A2DN | WT | WHITE | Positive | Positive | Negative      | ER | GREEN |
| TCGA-AO-A0JJ | WT | WHITE | Positive | Positive | Negative      | ER | GREEN |
| TCGA-E2-A10B | WT | WHITE | Positive | Positive | Negative      | ER | GREEN |
| TCGA-A2-A0ET | WT | WHITE | Positive | Positive | Negative      | ER | GREEN |
| TCGA-AR-A1AL | WT | WHITE | Positive | Positive | Negative      | ER | GREEN |
| TCGA-A2-A0EM | WT | WHITE | Positive | Positive | Negative      | ER | GREEN |
| TCGA-E2-A1L8 | WT | WHITE | Positive | Positive | Negative      | ER | GREEN |
| TCGA-BH-A0H9 | WT | WHITE | Positive | Positive | Negative      | ER | GREEN |

|              |    |       |          |          |               |    |       |
|--------------|----|-------|----------|----------|---------------|----|-------|
| TCGA-AN-A0XV | WT | WHITE | Positive | Positive | Negative      | ER | GREEN |
| TCGA-A7-A3J0 | WT | WHITE | Positive | Positive | Negative      | ER | GREEN |
| TCGA-D8-A27G | WT | WHITE | Positive | Positive | Negative      | ER | GREEN |
| TCGA-C8-A12X | WT | WHITE | Positive | Positive | Negative      | ER | GREEN |
| TCGA-A7-A0CG | WT | WHITE | Positive | Negative | Negative      | ER | GREEN |
| TCGA-A2-A1FZ | WT | WHITE | Positive | Positive | Negative      | ER | GREEN |
| TCGA-D8-A27I | WT | WHITE | Positive | Positive | Negative      | ER | GREEN |
| TCGA-A8-A0AD | WT | WHITE | Positive | Positive | Negative      | ER | GREEN |
| TCGA-E2-A14Q | WT | WHITE | Positive | Positive | Negative      | ER | GREEN |
| TCGA-E2-A154 | WT | WHITE | Positive | Positive | Negative      | ER | GREEN |
| TCGA-BH-A1FG | WT | WHITE | Positive | Positive | Negative      | ER | GREEN |
| TCGA-E2-A1IL | WT | WHITE | Positive | Positive | Negative      | ER | GREEN |
| TCGA-E2-A15P | WT | WHITE | Positive | Positive | Negative      | ER | GREEN |
| TCGA-E2-A1BD | WT | WHITE | Positive | Positive | Negative      | ER | GREEN |
| TCGA-E2-A1IF | WT | WHITE | Positive | Positive | Negative      | ER | GREEN |
| TCGA-BH-A0HP | WT | WHITE | Positive | Negative | Negative      | ER | GREEN |
| TCGA-A2-A3KD | WT | WHITE | Positive | Positive | Negative      | ER | GREEN |
| TCGA-AO-A125 | WT | WHITE | Positive | Positive | Negative      | ER | GREEN |
| TCGA-A8-A09B | WT | WHITE | Positive | Positive | Negative      | ER | GREEN |
| TCGA-E2-A15J | WT | WHITE | Positive | Positive | Negative      | ER | GREEN |
| TCGA-A7-A3J1 | WT | WHITE | Positive | Positive | Negative      | ER | GREEN |
| TCGA-AR-A2LE | WT | WHITE | Positive | Negative | NA            | ER | GREEN |
| TCGA-AC-A2FG | WT | WHITE | Positive | Negative | Negative      | ER | GREEN |
| TCGA-A7-A0DB | WT | WHITE | Positive | Positive | Negative      | ER | GREEN |
| TCGA-D8-A1XU | WT | WHITE | Positive | Positive | Negative      | ER | GREEN |
| TCGA-BH-A0HQ | WT | WHITE | Positive | Positive | Negative      | ER | GREEN |
| TCGA-D8-A146 | WT | WHITE | Positive | Positive | Negative      | ER | GREEN |
| TCGA-A2-A0YI | WT | WHITE | Positive | Positive | Negative      | ER | GREEN |
| TCGA-BH-A0H3 | WT | WHITE | Positive | Positive | Negative      | ER | GREEN |
| TCGA-AC-A2FO | WT | WHITE | Positive | Negative | Indeterminate | ER | GREEN |
| TCGA-AC-A3BB | WT | WHITE | Positive | Positive | Negative      | ER | GREEN |
| TCGA-A8-A08A | WT | WHITE | Positive | Positive | Negative      | ER | GREEN |
| TCGA-E2-A1IJ | WT | WHITE | Positive | Positive | Negative      | ER | GREEN |
| TCGA-AR-A2LM | WT | WHITE | Positive | Positive | Negative      | ER | GREEN |
| TCGA-BH-A0EA | WT | WHITE | Positive | Positive | Negative      | ER | GREEN |
| TCGA-E2-A15D | WT | WHITE | Positive | Positive | Negative      | ER | GREEN |
| TCGA-EW-A1J2 | WT | WHITE | Positive | Positive | Negative      | ER | GREEN |
| TCGA-A8-A09Z | WT | WHITE | Positive | Negative | Negative      | ER | GREEN |
| TCGA-E2-A1B4 | WT | WHITE | Positive | Positive | Negative      | ER | GREEN |
| TCGA-A1-A0SG | WT | WHITE | Positive | Positive | Negative      | ER | GREEN |
| TCGA-BH-A0E7 | WT | WHITE | Positive | Positive | Negative      | ER | GREEN |
| TCGA-A8-A06P | WT | WHITE | Positive | Positive | Negative      | ER | GREEN |
| TCGA-A7-A0D9 | WT | WHITE | Positive | Negative | Negative      | ER | GREEN |
| TCGA-GM-A2D9 | WT | WHITE | Positive | Positive | Negative      | ER | GREEN |
| TCGA-BH-A0H6 | WT | WHITE | Positive | Positive | Negative      | ER | GREEN |
| TCGA-BH-A0BM | WT | WHITE | Positive | Negative | Negative      | ER | GREEN |
| TCGA-A2-A04N | WT | WHITE | Positive | Positive | Negative      | ER | GREEN |
| TCGA-EW-A1IX | WT | WHITE | Positive | Positive | Negative      | ER | GREEN |

|              |    |       |          |          |          |    |       |
|--------------|----|-------|----------|----------|----------|----|-------|
| TCGA-A2-A0EW | WT | WHITE | Positive | Positive | Negative | ER | GREEN |
| TCGA-A2-A0T6 | WT | WHITE | Positive | Positive | Negative | ER | GREEN |
| TCGA-E2-A1BC | WT | WHITE | Positive | Positive | Negative | ER | GREEN |
| TCGA-GM-A2DM | WT | WHITE | Positive | Positive | Negative | ER | GREEN |
| TCGA-E2-A14U | WT | WHITE | Positive | Positive | Negative | ER | GREEN |
| TCGA-BH-A0DQ | WT | WHITE | Positive | Positive | Negative | ER | GREEN |
| TCGA-A2-A0EU | WT | WHITE | Positive | Positive | Negative | ER | GREEN |
| TCGA-A8-A091 | WT | WHITE | Positive | Negative | Negative | ER | GREEN |
| TCGA-E2-A153 | WT | WHITE | Positive | Positive | Negative | ER | GREEN |
| TCGA-A2-A0CP | WT | WHITE | Positive | Positive | Negative | ER | GREEN |
| TCGA-E9-A227 | WT | WHITE | Positive | Positive | Negative | ER | GREEN |
| TCGA-BH-A0W4 | WT | WHITE | Positive | Positive | Negative | ER | GREEN |
| TCGA-BH-A0EI | WT | WHITE | Positive | Positive | Negative | ER | GREEN |
| TCGA-E2-A1IG | WT | WHITE | Positive | Positive | Negative | ER | GREEN |
| TCGA-BH-A0AZ | WT | WHITE | Positive | Positive | Negative | ER | GREEN |
| TCGA-E9-A1NG | WT | WHITE | Positive | Positive | Negative | ER | GREEN |
| TCGA-A2-A0CV | WT | WHITE | Positive | Positive | Negative | ER | GREEN |
| TCGA-A2-A0CS | WT | WHITE | Positive | Positive | Negative | ER | GREEN |
| TCGA-BH-A0EB | WT | WHITE | Positive | Positive | Negative | ER | GREEN |
| TCGA-B6-A1KI | WT | WHITE | Positive | Positive | Negative | ER | GREEN |
| TCGA-BH-A0H5 | WT | WHITE | Positive | Positive | Negative | ER | GREEN |
| TCGA-E2-A1B5 | WT | WHITE | Positive | Positive | Negative | ER | GREEN |
| TCGA-A2-A25A | WT | WHITE | Positive | Positive | Negative | ER | GREEN |
| TCGA-AO-A0JF | WT | WHITE | Positive | Positive | Negative | ER | GREEN |
| TCGA-A8-A07G | WT | WHITE | Positive | Positive | Negative | ER | GREEN |
| TCGA-A2-A1G0 | WT | WHITE | Positive | Positive | Negative | ER | GREEN |
| TCGA-D8-A145 | WT | WHITE | Positive | Positive | Negative | ER | GREEN |
| TCGA-D8-A141 | WT | WHITE | Positive | Positive | Negative | ER | GREEN |
| TCGA-A2-A0EO | WT | WHITE | Positive | Positive | Negative | ER | GREEN |
| TCGA-BH-A0DV | WT | WHITE | Positive | Positive | Negative | ER | GREEN |
| TCGA-E2-A15C | WT | WHITE | Positive | Positive | Negative | ER | GREEN |
| TCGA-A2-A0EX | WT | WHITE | Positive | Positive | Negative | ER | GREEN |
| TCGA-D8-A1JH | WT | WHITE | Positive | Positive | Negative | ER | GREEN |
| TCGA-A8-A07J | WT | WHITE | Positive | Positive | Negative | ER | GREEN |
| TCGA-GI-A2C8 | WT | WHITE | Positive | Positive | Negative | ER | GREEN |
| TCGA-A2-A259 | WT | WHITE | Positive | Positive | Negative | ER | GREEN |
| TCGA-BH-A0BO | WT | WHITE | Positive | Positive | Negative | ER | GREEN |
| TCGA-AR-A24W | WT | WHITE | Positive | Positive | Negative | ER | GREEN |
| TCGA-EW-A1PG | WT | WHITE | Positive | Positive | Negative | ER | GREEN |
| TCGA-D8-A1JU | WT | WHITE | Positive | Positive | Negative | ER | GREEN |
| TCGA-AC-A2FK | WT | WHITE | Positive | Positive | Negative | ER | GREEN |
| TCGA-A2-A0ES | WT | WHITE | Positive | Positive | Negative | ER | GREEN |
| TCGA-A2-A0YK | WT | WHITE | Positive | Negative | Negative | ER | GREEN |
| TCGA-BH-A1FH | WT | WHITE | Positive | Negative | NA       | ER | GREEN |
| TCGA-AR-A2LQ | WT | WHITE | Positive | Positive | Negative | ER | GREEN |
| TCGA-AC-A2FF | WT | WHITE | Positive | Positive | Negative | ER | GREEN |
| TCGA-B6-A0WY | WT | WHITE | Positive | Negative | NA       | ER | GREEN |

|              |             |       |          |          |          |      |       |
|--------------|-------------|-------|----------|----------|----------|------|-------|
| TCGA-D8-A27L | WT          | WHITE | Positive | Positive | Negative | ER   | GREEN |
| TCGA-A2-A0EN | WT          | WHITE | Positive | Positive | Negative | ER   | GREEN |
| TCGA-BH-A208 | G187_splice | RED   | NA       | NA       | NA       | TNBC | RED   |
| TCGA-GM-A2DI | S260fs      | RED   | Negative | Negative | Negative | TNBC | RED   |
| TCGA-AO-A03U | WT          | WHITE | Negative | Negative | Negative | TNBC | RED   |
| TCGA-EW-A1P7 | WT          | WHITE | Negative | Negative | Negative | TNBC | RED   |
| TCGA-AR-A2LH | WT          | WHITE | Negative | Negative | Negative | TNBC | RED   |
| TCGA-EW-A1OV | WT          | WHITE | Negative | Negative | Negative | TNBC | RED   |
| TCGA-A2-A1G6 | WT          | WHITE | Negative | Negative | Negative | TNBC | RED   |
| TCGA-EW-A1P1 | WT          | WHITE | Negative | Negative | Negative | TNBC | RED   |
| TCGA-OL-A5RY | H179Q       | RED   | NA       | NA       | NA       | NA   | WHITE |
| TCGA-AC-A3OD | Q144*       | RED   | NA       | NA       | NA       | NA   | WHITE |
| TCGA-PE-A5DE | M169I       | RED   | NA       | NA       | NA       | NA   | WHITE |
| TCGA-BH-A5J0 | E285K       | RED   | NA       | NA       | NA       | NA   | WHITE |
| TCGA-B6-A401 | R175H       | RED   | NA       | NA       | NA       | NA   | WHITE |
| TCGA-OL-A5D6 | C242G       | RED   | NA       | NA       | NA       | NA   | WHITE |
| TCGA-AC-A5EH | L194R       | RED   | NA       | NA       | NA       | NA   | WHITE |
| TCGA-E9-A5UO | WT          | WHITE | NA       | NA       | NA       | NA   | WHITE |
| TCGA-E9-A245 | WT          | WHITE | NA       | NA       | NA       | NA   | WHITE |
| TCGA-E9-A5UP | WT          | WHITE | NA       | NA       | NA       | NA   | WHITE |
| TCGA-GM-A3NY | WT          | WHITE | NA       | NA       | NA       | NA   | WHITE |
| TCGA-AC-A3W7 | WT          | WHITE | NA       | NA       | NA       | NA   | WHITE |
| TCGA-B6-A40B | WT          | WHITE | NA       | NA       | NA       | NA   | WHITE |
| TCGA-E9-A54X | WT          | WHITE | NA       | NA       | NA       | NA   | WHITE |
| TCGA-A2-A0CK | WT          | WHITE | NA       | NA       | NA       | NA   | WHITE |
| TCGA-A7-A13H | WT          | WHITE | NA       | NA       | NA       | NA   | WHITE |
| TCGA-AR-A1AM | WT          | WHITE | NA       | NA       | NA       | NA   | WHITE |
| TCGA-AC-A3EH | WT          | WHITE | NA       | NA       | NA       | NA   | WHITE |
| TCGA-MS-A51U | WT          | WHITE | NA       | NA       | NA       | NA   | WHITE |
| TCGA-A2-A4S0 | WT          | WHITE | NA       | NA       | NA       | NA   | WHITE |
| TCGA-LL-A50Y | WT          | WHITE | NA       | NA       | NA       | NA   | WHITE |
| TCGA-AC-A3TN | WT          | WHITE | NA       | NA       | NA       | NA   | WHITE |
| TCGA-D8-A3Z6 | WT          | WHITE | NA       | NA       | NA       | NA   | WHITE |
| TCGA-AC-A3YJ | WT          | WHITE | NA       | NA       | NA       | NA   | WHITE |
| TCGA-E9-A3Q9 | WT          | WHITE | NA       | NA       | NA       | NA   | WHITE |
| TCGA-A2-A3XW | WT          | WHITE | NA       | NA       | NA       | NA   | WHITE |
| TCGA-E9-A2JT | WT          | WHITE | NA       | NA       | NA       | NA   | WHITE |
| TCGA-E9-A1R6 | WT          | WHITE | NA       | NA       | NA       | NA   | WHITE |
| TCGA-OL-A5D8 | WT          | WHITE | NA       | NA       | NA       | NA   | WHITE |
| TCGA-LL-A5YN | WT          | WHITE | NA       | NA       | NA       | NA   | WHITE |
| TCGA-EW-A423 | WT          | WHITE | NA       | NA       | NA       | NA   | WHITE |
| TCGA-A7-A425 | WT          | WHITE | NA       | NA       | NA       | NA   | WHITE |
| TCGA-PE-A5DD | WT          | WHITE | NA       | NA       | NA       | NA   | WHITE |
| TCGA-B6-A408 | WT          | WHITE | NA       | NA       | NA       | NA   | WHITE |
| TCGA-AR-A2LJ | WT          | WHITE | NA       | NA       | NA       | NA   | WHITE |
| TCGA-EW-A3E8 | WT          | WHITE | NA       | NA       | NA       | NA   | WHITE |
| TCGA-E9-A1R4 | WT          | WHITE | NA       | NA       | NA       | NA   | WHITE |
| TCGA-AC-A2FE | WT          | WHITE | NA       | NA       | NA       | NA   | WHITE |



|              |    |       |          |          |    |    |       |
|--------------|----|-------|----------|----------|----|----|-------|
| TCGA-A7-A4SB | WT | WHITE | NA       | NA       | NA | NA | WHITE |
| TCGA-E2-A570 | WT | WHITE | NA       | NA       | NA | NA | WHITE |
| TCGA-AR-A5QP | WT | WHITE | NA       | NA       | NA | NA | WHITE |
| TCGA-E9-A1RC | WT | WHITE | NA       | NA       | NA | NA | WHITE |
| TCGA-A2-A3KC | WT | WHITE | NA       | NA       | NA | NA | WHITE |
| TCGA-C8-A3M7 | WT | WHITE | NA       | NA       | NA | NA | WHITE |
| TCGA-AR-A5QN | WT | WHITE | NA       | NA       | NA | NA | WHITE |
| TCGA-A7-A0CH | WT | WHITE | NA       | NA       | NA | NA | WHITE |
| TCGA-E9-A1R5 | WT | WHITE | NA       | NA       | NA | NA | WHITE |
| TCGA-E9-A1R3 | WT | WHITE | NA       | NA       | NA | NA | WHITE |
| TCGA-E9-A229 | WT | WHITE | NA       | NA       | NA | NA | WHITE |
| TCGA-AQ-A54O | WT | WHITE | NA       | NA       | NA | NA | WHITE |
| TCGA-E9-A1RA | WT | WHITE | NA       | NA       | NA | NA | WHITE |
| TCGA-C8-A12Y | WT | WHITE | NA       | NA       | NA | NA | WHITE |
| TCGA-E9-A1RD | WT | WHITE | NA       | NA       | NA | NA | WHITE |
| TCGA-E9-A24A | WT | WHITE | NA       | NA       | NA | NA | WHITE |
| TCGA-E9-A1R0 | WT | WHITE | NA       | NA       | NA | NA | WHITE |
| TCGA-E9-A1N3 | WT | WHITE | NA       | NA       | NA | NA | WHITE |
| TCGA-AC-A3W6 | WT | WHITE | NA       | NA       | NA | NA | WHITE |
| TCGA-OL-A66H | WT | WHITE | NA       | NA       | NA | NA | WHITE |
| TCGA-AR-A5QM | WT | WHITE | NA       | NA       | NA | NA | WHITE |
| TCGA-A7-A426 | WT | WHITE | NA       | NA       | NA | NA | WHITE |
| TCGA-OL-A66K | WT | WHITE | NA       | NA       | NA | NA | WHITE |
| TCGA-GM-A3NW | WT | WHITE | NA       | NA       | NA | NA | WHITE |
| TCGA-A2-A4S2 | WT | WHITE | NA       | NA       | NA | NA | WHITE |
| TCGA-OL-A5RX | WT | WHITE | NA       | NA       | NA | NA | WHITE |
| TCGA-GM-A3XN | WT | WHITE | NA       | NA       | NA | NA | WHITE |
| TCGA-OL-A5RV | WT | WHITE | NA       | NA       | NA | NA | WHITE |
| TCGA-B6-A0RN | WT | WHITE | Negative | Negative | NA | NA | WHITE |
| TCGA-A2-A0CR | WT | WHITE | NA       | NA       | NA | NA | WHITE |
| TCGA-E9-A3X8 | WT | WHITE | NA       | NA       | NA | NA | WHITE |
| TCGA-A2-A4RW | WT | WHITE | NA       | NA       | NA | NA | WHITE |
| TCGA-OL-A66J | WT | WHITE | NA       | NA       | NA | NA | WHITE |
| TCGA-AC-A3HN | WT | WHITE | NA       | NA       | NA | NA | WHITE |
| TCGA-OL-A5DA | WT | WHITE | NA       | NA       | NA | NA | WHITE |
| TCGA-E9-A5FK | WT | WHITE | NA       | NA       | NA | NA | WHITE |
| TCGA-AC-A3QP | WT | WHITE | NA       | NA       | NA | NA | WHITE |
| TCGA-BH-A42U | WT | WHITE | NA       | NA       | NA | NA | WHITE |
| TCGA-GM-A3XG | WT | WHITE | NA       | NA       | NA | NA | WHITE |
| TCGA-OL-A5RU | WT | WHITE | NA       | NA       | NA | NA | WHITE |
| TCGA-D8-A3Z5 | WT | WHITE | NA       | NA       | NA | NA | WHITE |
| TCGA-GM-A5PV | WT | WHITE | NA       | NA       | NA | NA | WHITE |
| TCGA-A7-A5ZX | WT | WHITE | NA       | NA       | NA | NA | WHITE |
| TCGA-GM-A5PX | WT | WHITE | NA       | NA       | NA | NA | WHITE |
| TCGA-BH-A42V | WT | WHITE | NA       | NA       | NA | NA | WHITE |
| TCGA-GM-A4E0 | WT | WHITE | NA       | NA       | NA | NA | WHITE |
| TCGA-HN-A2OB | WT | WHITE | NA       | NA       | NA | NA | WHITE |

|              |             |       |               |          |           |         |        |
|--------------|-------------|-------|---------------|----------|-----------|---------|--------|
| TCGA-D8-A4Z1 | WT          | WHITE | NA            | NA       | NA        | NA      | WHITE  |
| TCGA-A2-A0CO | WT          | WHITE | NA            | NA       | NA        | NA      | WHITE  |
| TCGA-A2-A4RY | WT          | WHITE | NA            | NA       | NA        | NA      | WHITE  |
| TCGA-BH-A28O | WT          | WHITE | NA            | NA       | NA        | NA      | WHITE  |
| TCGA-AC-A5XS | WT          | WHITE | NA            | NA       | NA        | NA      | WHITE  |
| TCGA-AN-A0XS | WT          | WHITE | Negative      | Positive | Negative  | NA      | WHITE  |
| TCGA-A1-A0SH | WT          | WHITE | Negative      | Positive | Negative  | NA      | WHITE  |
| TCGA-AC-A62Y | WT          | WHITE | NA            | NA       | NA        | NA      | WHITE  |
| TCGA-A2-A0EP | WT          | WHITE | NA            | NA       | NA        | NA      | WHITE  |
| TCGA-E9-A1RI | WT          | WHITE | NA            | NA       | NA        | NA      | WHITE  |
| TCGA-A7-A5ZW | WT          | WHITE | NA            | NA       | NA        | NA      | WHITE  |
| TCGA-AC-A3YI | WT          | WHITE | NA            | NA       | NA        | NA      | WHITE  |
| TCGA-LL-A440 | WT          | WHITE | NA            | NA       | NA        | NA      | WHITE  |
| TCGA-E2-A14Y | Q136E       | RED   | Positive      | Positive | Positive  | ER/HER2 | PURPLE |
| TCGA-C8-A130 | N131fs      | RED   | Positive      | Positive | Equivocal | ER/HER2 | PURPLE |
| TCGA-AN-A0FJ | V157fs      | RED   | Positive      | Negative | Positive  | ER/HER2 | PURPLE |
| TCGA-BH-A18U | E286K       | RED   | Positive      | Positive | Positive  | ER/HER2 | PURPLE |
| TCGA-C8-A12T | T102fs      | RED   | Positive      | Positive | Positive  | ER/HER2 | PURPLE |
| TCGA-AN-A0AJ | G108fs      | RED   | Positive      | Positive | Positive  | ER/HER2 | PURPLE |
| TCGA-B6-A0IJ | Y220C       | RED   | Positive      | Positive | NA        | ER/HER2 | PURPLE |
| TCGA-B6-A0I9 | C135Y       | RED   | Indeterminate | Positive | NA        | ER/HER2 | PURPLE |
| TCGA-D8-A1XJ | R282G       | RED   | Positive      | Positive | Positive  | ER/HER2 | PURPLE |
| TCGA-C8-A26W | R273L       | RED   | Positive      | Positive | Equivocal | ER/HER2 | PURPLE |
| TCGA-EW-A1OZ | E258*       | RED   | Positive      | Negative | Positive  | ER/HER2 | PURPLE |
| TCGA-AR-A254 | C124*       | RED   | Positive      | Positive | Positive  | ER/HER2 | PURPLE |
| TCGA-A2-A0YG | T125_splice | RED   | Positive      | Positive | Positive  | ER/HER2 | PURPLE |
| TCGA-A7-A2KD | L93fs       | RED   | Positive      | Positive | Positive  | ER/HER2 | PURPLE |
| TCGA-A8-A09I | WT          | WHITE | Positive      | Positive | Positive  | ER/HER2 | PURPLE |
| TCGA-E2-A14V | WT          | WHITE | Positive      | Positive | Positive  | ER/HER2 | PURPLE |
| TCGA-BH-A0DD | WT          | WHITE | Positive      | Positive | Positive  | ER/HER2 | PURPLE |
| TCGA-C8-A1HL | WT          | WHITE | Positive      | Negative | Equivocal | ER/HER2 | PURPLE |
| TCGA-E9-A22D | WT          | WHITE | Positive      | Positive | Positive  | ER/HER2 | PURPLE |
| TCGA-A1-A0SN | WT          | WHITE | Positive      | Positive | Positive  | ER/HER2 | PURPLE |
| TCGA-B6-A0X5 | WT          | WHITE | Positive      | Positive | NA        | ER/HER2 | PURPLE |
| TCGA-AO-A0JM | WT          | WHITE | Positive      | Positive | Positive  | ER/HER2 | PURPLE |
| TCGA-AN-A0AK | WT          | WHITE | Positive      | Negative | Positive  | ER/HER2 | PURPLE |
| TCGA-C8-A1HF | H179Y       | RED   | Negative      | Positive | Positive  | HER2    | BLUE   |
| TCGA-E2-A14P | V157F       | RED   | Negative      | Negative | Positive  | HER2    | BLUE   |
| TCGA-B6-A1KF | T125_splice | RED   | Negative      | Negative | Equivocal | HER2    | BLUE   |
| TCGA-A2-A04U | G108fs      | RED   | Negative      | Negative | Positive  | HER2    | BLUE   |
| TCGA-C8-A1HK | R280*       | RED   | Negative      | Negative | Positive  | HER2    | BLUE   |
| TCGA-E9-A1N9 | R196*       | RED   | Negative      | Positive | Positive  | HER2    | BLUE   |
| TCGA-A2-A1G1 | V225_splice | RED   | Negative      | Negative | Positive  | HER2    | BLUE   |
| TCGA-A8-A07R | R248W       | RED   | Negative      | Negative | Positive  | HER2    | BLUE   |
| TCGA-BH-A18R | WT          | WHITE | Indeterminate | Negative | Positive  | HER2    | BLUE   |
| TCGA-BH-A0EE | WT          | WHITE | Negative      | Negative | Positive  | HER2    | BLUE   |
| TCGA-E9-A22G | WT          | WHITE | Negative      | Negative | Positive  | HER2    | BLUE   |
| TCGA-C8-A137 | WT          | WHITE | Negative      | Negative | Positive  | HER2    | BLUE   |

|              |             |       |          |               |          |      |       |
|--------------|-------------|-------|----------|---------------|----------|------|-------|
| TCGA-AR-A1AJ | R273H       | RED   | Positive | Negative      | Negative | ER   | GREEN |
| TCGA-A8-A079 | S215I       | RED   | Positive | Positive      | Negative | ER   | GREEN |
| TCGA-AO-A03R | L265R       | RED   | Positive | Positive      | Negative | ER   | GREEN |
| TCGA-C8-A1HG | C141R       | RED   | Positive | Positive      | Negative | ER   | GREEN |
| TCGA-A2-A0CW | R196*       | RED   | Positive | Positive      | Negative | ER   | GREEN |
| TCGA-D8-A1Y3 | R213*       | RED   | Positive | Positive      | Negative | ER   | GREEN |
| TCGA-C8-A1HM | L194P       | RED   | Positive | Positive      | Negative | ER   | GREEN |
| TCGA-AO-A0JD | H193L       | RED   | Positive | Positive      | Negative | ER   | GREEN |
| TCGA-AR-A251 | E285K       | RED   | Positive | Negative      | Negative | ER   | GREEN |
| TCGA-D8-A1JM | R273H       | RED   | Positive | Negative      | Negative | ER   | GREEN |
| TCGA-EW-A1PC | R273C       | RED   | Positive | Positive      | Negative | ER   | GREEN |
| TCGA-AR-A1AH | G108fs      | RED   | Positive | Negative      | Negative | ER   | GREEN |
| TCGA-AN-A0FY | V173M       | RED   | Positive | Positive      | Negative | ER   | GREEN |
| TCGA-AO-A03O | R175H       | RED   | Positive | Positive      | Negative | ER   | GREEN |
| TCGA-A8-A094 | R209fs      | RED   | Positive | Negative      | Negative | ER   | GREEN |
| TCGA-A7-A13E | R175H       | RED   | Positive | Negative      | Negative | ER   | GREEN |
| TCGA-AO-A03L | S261_splice | RED   | Positive | Positive      | Negative | ER   | GREEN |
| TCGA-EW-A1PA | R213*       | RED   | Positive | Positive      | Negative | ER   | GREEN |
| TCGA-AR-A0U2 | C176F       | RED   | Positive | Positive      | Negative | ER   | GREEN |
| TCGA-C8-A27A | G199V       | RED   | Positive | Positive      | Negative | ER   | GREEN |
| TCGA-BH-A0HU | WT          | WHITE | Positive | Positive      | Negative | ER   | GREEN |
| TCGA-A8-A08L | WT          | WHITE | Positive | Negative      | Negative | ER   | GREEN |
| TCGA-BH-A209 | WT          | WHITE | Positive | Positive      | NA       | ER   | GREEN |
| TCGA-A8-A07L | WT          | WHITE | Positive | Positive      | Negative | ER   | GREEN |
| TCGA-AR-A24Q | WT          | WHITE | Positive | Negative      | Negative | ER   | GREEN |
| TCGA-AR-A24H | WT          | WHITE | Positive | Positive      | Negative | ER   | GREEN |
| TCGA-BH-A1FM | WT          | WHITE | Positive | Negative      | NA       | ER   | GREEN |
| TCGA-C8-A12U | WT          | WHITE | Positive | Positive      | Negative | ER   | GREEN |
| TCGA-AR-A0TY | WT          | WHITE | Positive | Negative      | Negative | ER   | GREEN |
| TCGA-BH-A0HB | WT          | WHITE | Positive | Positive      | Negative | ER   | GREEN |
| TCGA-A8-A08F | WT          | WHITE | Positive | Positive      | Negative | ER   | GREEN |
| TCGA-EW-A2FV | WT          | WHITE | Positive | Positive      | Negative | ER   | GREEN |
| TCGA-E2-A15S | WT          | WHITE | Positive | Negative      | Negative | ER   | GREEN |
| TCGA-E2-A109 | WT          | WHITE | Positive | Negative      | Negative | ER   | GREEN |
| TCGA-A8-A09W | WT          | WHITE | Positive | Positive      | Negative | ER   | GREEN |
| TCGA-A2-A0D4 | WT          | WHITE | Positive | Positive      | Negative | ER   | GREEN |
| TCGA-BH-A0C7 | WT          | WHITE | Positive | Negative      | Negative | ER   | GREEN |
| TCGA-D8-A1XF | WT          | WHITE | Positive | Positive      | Negative | ER   | GREEN |
| TCGA-A7-A13F | WT          | WHITE | Positive | Positive      | Negative | ER   | GREEN |
| TCGA-EW-A2FW | WT          | WHITE | Positive | Positive      | Negative | ER   | GREEN |
| TCGA-AN-A0FW | WT          | WHITE | Positive | Indeterminate | Negative | ER   | GREEN |
| TCGA-A8-A09D | WT          | WHITE | Positive | Positive      | Negative | ER   | GREEN |
| TCGA-AN-A0AM | WT          | WHITE | Positive | Negative      | Negative | ER   | GREEN |
| TCGA-D8-A13Y | WT          | WHITE | Positive | Positive      | Negative | ER   | GREEN |
| TCGA-A2-A25B | WT          | WHITE | Positive | Positive      | Negative | ER   | GREEN |
| TCGA-A1-A0SP | S183*       | RED   | Negative | Negative      | Negative | TNBC | RED   |
| TCGA-EW-A1PH | K292fs      | RED   | Negative | Negative      | Negative | TNBC | RED   |

|              |             |     |          |          |           |      |     |
|--------------|-------------|-----|----------|----------|-----------|------|-----|
| TCGA-E2-A159 | V216M       | RED | Negative | Negative | Negative  | TNBC | RED |
| TCGA-E2-A1B6 | R342*       | RED | Negative | Negative | Negative  | TNBC | RED |
| TCGA-AO-A129 | R175H       | RED | Negative | Negative | Negative  | TNBC | RED |
| TCGA-BH-A1F6 | S127P       | RED | Negative | Negative | Negative  | TNBC | RED |
| TCGA-BH-A18V | E56*        | RED | Negative | Negative | Negative  | TNBC | RED |
| TCGA-AR-A1AI | F270I       | RED | Negative | Negative | Negative  | TNBC | RED |
| TCGA-A2-A0YM | R333fs      | RED | Negative | Negative | Negative  | TNBC | RED |
| TCGA-C8-A275 | G266E       | RED | NA       | NA       | NA        | TNBC | RED |
| TCGA-A7-A0CE | T155P       | RED | Negative | Negative | Negative  | TNBC | RED |
| TCGA-BH-A0B3 | V216M       | RED | Negative | Negative | Negative  | TNBC | RED |
| TCGA-AN-A0AR | E171fs      | RED | Negative | Negative | Negative  | TNBC | RED |
| TCGA-AR-A0TS | E198*       | RED | Negative | Negative | Negative  | TNBC | RED |
| TCGA-AO-A124 | R213*       | RED | Negative | Negative | Negative  | TNBC | RED |
| TCGA-C8-A12L | C238F       | RED | Negative | Negative | Equivocal | TNBC | RED |
| TCGA-E2-A1LG | I255del     | RED | Negative | Negative | Negative  | TNBC | RED |
| TCGA-A7-A26I | G266E       | RED | Negative | Negative | Negative  | TNBC | RED |
| TCGA-D8-A147 | C176F       | RED | Negative | Negative | Negative  | TNBC | RED |
| TCGA-E2-A1II | Y126_splice | RED | Negative | Positive | Negative  | TNBC | RED |
| TCGA-C8-A12K | I195T       | RED | NA       | NA       | NA        | TNBC | RED |
| TCGA-E2-A14N | R196*       | RED | Negative | Negative | Negative  | TNBC | RED |
| TCGA-A8-A08R | C238fs      | RED | Negative | Negative | Negative  | TNBC | RED |
| TCGA-A2-A0CM | E204fs      | RED | Negative | Negative | Negative  | TNBC | RED |
| TCGA-BH-A1FC | V225_splice | RED | Negative | Negative | Negative  | TNBC | RED |
| TCGA-E2-A1L7 | I255F       | RED | Negative | Negative | Negative  | TNBC | RED |
| TCGA-A1-A0SK | M133K       | RED | Negative | Negative | Negative  | TNBC | RED |
| TCGA-AR-A2LR | S241fs      | RED | Negative | Negative | Negative  | TNBC | RED |
| TCGA-GM-A2DH | Q331*       | RED | Negative | Negative | Negative  | TNBC | RED |
| TCGA-BH-A0B9 | P278T       | RED | Negative | Negative | Negative  | TNBC | RED |
| TCGA-A7-A13D | E221*       | RED | Negative | Positive | Negative  | TNBC | RED |
| TCGA-EW-A1P4 | H179R       | RED | Negative | Negative | Negative  | TNBC | RED |
| TCGA-A2-A0YE | I162fs      | RED | Negative | Negative | Negative  | TNBC | RED |
| TCGA-AO-A0J2 | R175H       | RED | Negative | Negative | Negative  | TNBC | RED |
| TCGA-C8-A134 | R273H       | RED | Negative | Negative | Equivocal | TNBC | RED |
| TCGA-AR-A1AQ | R342fs      | RED | Negative | Negative | Negative  | TNBC | RED |
| TCGA-AR-A1AY | V122fs      | RED | Negative | Negative | Negative  | TNBC | RED |
| TCGA-BH-A18T | Y107D       | RED | Negative | Negative | Negative  | TNBC | RED |
| TCGA-AR-A1AR | S90fs       | RED | Negative | Negative | Negative  | TNBC | RED |
| TCGA-AR-A256 | F109fs      | RED | Negative | Negative | Negative  | TNBC | RED |
| TCGA-C8-A27B | H193R       | RED | Negative | Negative | Negative  | TNBC | RED |
| TCGA-D8-A27F | S241fs      | RED | Negative | Negative | Negative  | TNBC | RED |
| TCGA-C8-A1HJ | R196*       | RED | Negative | Negative | Negative  | TNBC | RED |
| TCGA-A2-A0D0 | R196*       | RED | Negative | Negative | Negative  | TNBC | RED |
| TCGA-A8-A07O | T125_splice | RED | Negative | Negative | Negative  | TNBC | RED |
| TCGA-E2-A14R | I195T       | RED | Negative | Negative | Negative  | TNBC | RED |
| TCGA-C8-A131 | R175H       | RED | Negative | Negative | Negative  | TNBC | RED |
| TCGA-BH-A0E6 | C238fs      | RED | Negative | Negative | Negative  | TNBC | RED |
| TCGA-BH-A203 | R273H       | RED | NA       | NA       | NA        | TNBC | RED |
| TCGA-AN-A0AL | R175H       | RED | Negative | Negative | Negative  | TNBC | RED |

|              |             |       |          |          |          |      |       |
|--------------|-------------|-------|----------|----------|----------|------|-------|
| TCGA-E9-A1RH | E339fs      | RED   | NA       | NA       | NA       | TNBC | RED   |
| TCGA-E9-A244 | R175H       | RED   | NA       | NA       | NA       | TNBC | RED   |
| TCGA-BH-A0WA | S241C       | RED   | Negative | Negative | Negative | TNBC | RED   |
| TCGA-A2-A0EQ | 162_163IY>N | RED   | Negative | Negative | Negative | TNBC | RED   |
| TCGA-D8-A13Z | C141Y       | RED   | Negative | Negative | Negative | TNBC | RED   |
| TCGA-E9-A248 | H115fs      | RED   | NA       | NA       | NA       | TNBC | RED   |
| TCGA-D8-A1JL | H193L       | RED   | Negative | Negative | Negative | TNBC | RED   |
| TCGA-A7-A26F | C176F       | RED   | Negative | Negative | Negative | TNBC | RED   |
| TCGA-D8-A1XQ | L252fs      | RED   | Negative | Negative | Negative | TNBC | RED   |
| TCGA-AO-A0J6 | T211fs      | RED   | Negative | Negative | Negative | TNBC | RED   |
| TCGA-BH-A0E0 | R175H       | RED   | Negative | Negative | Negative | TNBC | RED   |
| TCGA-A8-A07U | F328fs      | RED   | Negative | Positive | Negative | TNBC | RED   |
| TCGA-A2-A04T | R273H,D208G | RED   | Negative | Negative | Negative | TNBC | RED   |
| TCGA-EW-A1PB | WT          | WHITE | Negative | Negative | Negative | TNBC | RED   |
| TCGA-AN-A0XU | WT          | WHITE | Negative | Negative | Negative | TNBC | RED   |
| TCGA-AO-A0J4 | WT          | WHITE | Negative | Negative | Negative | TNBC | RED   |
| TCGA-BH-A0AV | WT          | WHITE | Negative | Negative | Negative | TNBC | RED   |
| TCGA-E2-A1AZ | WT          | WHITE | Negative | Negative | Negative | TNBC | RED   |
| TCGA-AC-A2BK | WT          | WHITE | Negative | Negative | Negative | TNBC | RED   |
| TCGA-E2-A1LI | WT          | WHITE | Negative | Negative | Negative | TNBC | RED   |
| TCGA-EW-A1P8 | WT          | WHITE | Negative | Negative | Negative | TNBC | RED   |
| TCGA-D8-A143 | WT          | WHITE | Negative | Negative | Negative | TNBC | RED   |
| TCGA-E2-A1LL | WT          | WHITE | Negative | Negative | Negative | TNBC | RED   |
| TCGA-AO-A1KR | WT          | WHITE | Negative | Negative | Negative | TNBC | RED   |
| TCGA-D8-A1XK | WT          | WHITE | Negative | Negative | Negative | TNBC | RED   |
| TCGA-A2-A0D2 | WT          | WHITE | Negative | Negative | Negative | TNBC | RED   |
| TCGA-AN-A04D | WT          | WHITE | Negative | Negative | Negative | TNBC | RED   |
| TCGA-AO-A12F | WT          | WHITE | Negative | Negative | Negative | TNBC | RED   |
| TCGA-E2-A1LK | WT          | WHITE | Negative | Negative | Negative | TNBC | RED   |
| TCGA-A2-A0T0 | WT          | WHITE | Negative | Negative | Negative | TNBC | RED   |
| TCGA-AN-A0AT | WT          | WHITE | Negative | Negative | Negative | TNBC | RED   |
| TCGA-OL-A5RW | R209fs      | RED   | NA       | NA       | NA       | NA   | WHITE |
| TCGA-B6-A400 | G108fs      | RED   | NA       | NA       | NA       | NA   | WHITE |
| TCGA-BH-A5IZ | R273H       | RED   | NA       | NA       | NA       | NA   | WHITE |
| TCGA-E9-A1RB | E286Q       | RED   | NA       | NA       | NA       | NA   | WHITE |
| TCGA-B6-A0RU | R196*       | RED   | Negative | Negative | NA       | NA   | WHITE |
| TCGA-E2-A573 | Y220C       | RED   | NA       | NA       | NA       | NA   | WHITE |
| TCGA-AR-A5QQ | R209fs      | RED   | NA       | NA       | NA       | NA   | WHITE |
| TCGA-A2-A3Y0 | R342*       | RED   | NA       | NA       | NA       | NA   | WHITE |
| TCGA-GM-A3XL | R156del     | RED   | NA       | NA       | NA       | NA   | WHITE |
| TCGA-A2-A3XT | C135R       | RED   | NA       | NA       | NA       | NA   | WHITE |
| TCGA-A7-A4SE | S261_splice | RED   | NA       | NA       | NA       | NA   | WHITE |
| TCGA-A2-A3XX | L111P       | RED   | NA       | NA       | NA       | NA   | WHITE |
| TCGA-OL-A5D7 | V272M       | RED   | NA       | NA       | NA       | NA   | WHITE |
| TCGA-B6-A0X1 | Q331_splice | RED   | Negative | Negative | NA       | NA   | WHITE |
| TCGA-B6-A0IQ | R213*       | RED   | Negative | Negative | NA       | NA   | WHITE |
| TCGA-OL-A66I | R342*       | RED   | NA       | NA       | NA       | NA   | WHITE |
| TCGA-B6-A409 | L252fs      | RED   | NA       | NA       | NA       | NA   | WHITE |

|              |             |       |          |          |           |         |        |
|--------------|-------------|-------|----------|----------|-----------|---------|--------|
| TCGA-B6-A402 | R196*       | RED   | NA       | NA       | NA        | NA      | WHITE  |
| TCGA-A2-A4S3 | K132E       | RED   | NA       | NA       | NA        | NA      | WHITE  |
| TCGA-LL-A5YO | L194R       | RED   | NA       | NA       | NA        | NA      | WHITE  |
| TCGA-B6-A0RE | S303fs      | RED   | Negative | Negative | NA        | NA      | WHITE  |
| TCGA-E2-A574 | WT          | WHITE | NA       | NA       | NA        | NA      | WHITE  |
| TCGA-HN-A2NL | WT          | WHITE | NA       | NA       | NA        | NA      | WHITE  |
| TCGA-OL-A5S0 | WT          | WHITE | NA       | NA       | NA        | NA      | WHITE  |
| TCGA-B6-A0I1 | WT          | WHITE | Negative | Negative | NA        | NA      | WHITE  |
| TCGA-A2-A3XU | WT          | WHITE | NA       | NA       | NA        | NA      | WHITE  |
| TCGA-E9-A2JS | WT          | WHITE | NA       | NA       | NA        | NA      | WHITE  |
| TCGA-BH-A42T | WT          | WHITE | NA       | NA       | NA        | NA      | WHITE  |
| TCGA-E9-A228 | WT          | WHITE | NA       | NA       | NA        | NA      | WHITE  |
| TCGA-B6-A0RT | WT          | WHITE | Negative | Negative | NA        | NA      | WHITE  |
| TCGA-E9-A3QA | WT          | WHITE | NA       | NA       | NA        | NA      | WHITE  |
| TCGA-A8-A075 | G187_splice | RED   | Positive | Positive | Positive  | ER/HER2 | PURPLE |
| TCGA-BH-A0C0 | R110fs      | RED   | Positive | Positive | Positive  | ER/HER2 | PURPLE |
| TCGA-D8-A1J9 | V173L       | RED   | Positive | Negative | Positive  | ER/HER2 | PURPLE |
| TCGA-BH-A0AW | F270S       | RED   | Positive | Negative | Positive  | ER/HER2 | PURPLE |
| TCGA-D8-A27N | R175H       | RED   | Positive | Positive | Positive  | ER/HER2 | PURPLE |
| TCGA-BH-A202 | R213*       | RED   | Positive | Positive | Positive  | ER/HER2 | PURPLE |
| TCGA-BH-A1FN | R280T       | RED   | Positive | Positive | NA        | ER/HER2 | PURPLE |
| TCGA-BH-A1F2 | E285K       | RED   | Positive | Positive | Positive  | ER/HER2 | PURPLE |
| TCGA-AQ-A04H | V197G       | RED   | Positive | Positive | Positive  | ER/HER2 | PURPLE |
| TCGA-A8-A06U | R209fs      | RED   | Positive | Positive | Positive  | ER/HER2 | PURPLE |
| TCGA-BH-A0DZ | E258Q       | RED   | Positive | Positive | Positive  | ER/HER2 | PURPLE |
| TCGA-BH-A0B7 | G187_splice | RED   | Positive | Positive | Positive  | ER/HER2 | PURPLE |
| TCGA-A8-A097 | P250fs      | RED   | Positive | Positive | Positive  | ER/HER2 | PURPLE |
| TCGA-C8-A138 | A307fs      | RED   | Positive | Negative | Equivocal | ER/HER2 | PURPLE |
| TCGA-AN-A0FT | H193R       | RED   | Positive | Positive | Positive  | ER/HER2 | PURPLE |
| TCGA-B6-A0RH | Y220S       | RED   | Positive | Positive | NA        | ER/HER2 | PURPLE |
| TCGA-E2-A152 | K132E       | RED   | Positive | Negative | Positive  | ER/HER2 | PURPLE |
| TCGA-AR-A0TX | Y205C       | RED   | Positive | Positive | Positive  | ER/HER2 | PURPLE |
| TCGA-AQ-A04L | H193R       | RED   | Positive | Negative | Positive  | ER/HER2 | PURPLE |
| TCGA-BH-A1FJ | WT          | WHITE | Negative | Positive | NA        | ER/HER2 | PURPLE |
| TCGA-EW-A1J3 | WT          | WHITE | Positive | Positive | Positive  | ER/HER2 | PURPLE |
| TCGA-EW-A1IW | WT          | WHITE | Positive | Positive | Positive  | ER/HER2 | PURPLE |
| TCGA-A8-A09G | WT          | WHITE | Positive | Negative | Positive  | ER/HER2 | PURPLE |
| TCGA-A8-A07I | WT          | WHITE | Positive | Negative | Positive  | ER/HER2 | PURPLE |
| TCGA-C8-A1HN | WT          | WHITE | Positive | Positive | Equivocal | ER/HER2 | PURPLE |
| TCGA-A8-A08B | WT          | WHITE | Positive | Negative | Positive  | ER/HER2 | PURPLE |
| TCGA-BH-A18P | WT          | WHITE | Positive | Negative | Positive  | ER/HER2 | PURPLE |
| TCGA-A8-A07B | WT          | WHITE | Positive | Positive | Positive  | ER/HER2 | PURPLE |
| TCGA-D8-A1XS | WT          | WHITE | Positive | Positive | Positive  | ER/HER2 | PURPLE |
| TCGA-B6-A0WV | WT          | WHITE | Positive | Positive | NA        | ER/HER2 | PURPLE |
| TCGA-A2-A25E | WT          | WHITE | Positive | Positive | Equivocal | ER/HER2 | PURPLE |
| TCGA-EW-A1PD | WT          | WHITE | Positive | Positive | Positive  | ER/HER2 | PURPLE |
| TCGA-BH-A0HY | WT          | WHITE | Positive | Negative | Positive  | ER/HER2 | PURPLE |
| TCGA-AC-A23H | WT          | WHITE | Positive | Negative | Positive  | ER/HER2 | PURPLE |

|              |             |       |          |          |           |         |        |
|--------------|-------------|-------|----------|----------|-----------|---------|--------|
| TCGA-A2-A0CX | WT          | WHITE | Positive | Negative | Positive  | ER/HER2 | PURPLE |
| TCGA-AR-A250 | WT          | WHITE | Positive | Negative | Positive  | ER/HER2 | PURPLE |
| TCGA-A8-A06R | WT          | WHITE | Positive | Negative | Positive  | ER/HER2 | PURPLE |
| TCGA-E2-A14W | WT          | WHITE | Positive | Positive | Positive  | ER/HER2 | PURPLE |
| TCGA-D8-A27W | WT          | WHITE | Positive | Positive | Positive  | ER/HER2 | PURPLE |
| TCGA-A8-A06X | WT          | WHITE | Positive | Negative | Positive  | ER/HER2 | PURPLE |
| TCGA-BH-A1F8 | WT          | WHITE | Positive | Positive | Positive  | ER/HER2 | PURPLE |
| TCGA-E9-A22H | WT          | WHITE | Positive | Positive | Positive  | ER/HER2 | PURPLE |
| TCGA-B6-A0IG | WT          | WHITE | Positive | Positive | NA        | ER/HER2 | PURPLE |
| TCGA-B6-A0RI | WT          | WHITE | Positive | Positive | NA        | ER/HER2 | PURPLE |
| TCGA-E2-A105 | WT          | WHITE | Positive | Positive | Equivocal | ER/HER2 | PURPLE |
| TCGA-AN-A0FZ | WT          | WHITE | Positive | Negative | Positive  | ER/HER2 | PURPLE |
| TCGA-A2-A04X | WT          | WHITE | Positive | Positive | Positive  | ER/HER2 | PURPLE |
| TCGA-B6-A0IM | WT          | WHITE | Positive | Positive | NA        | ER/HER2 | PURPLE |
| TCGA-A8-A09N | WT          | WHITE | Positive | Positive | Positive  | ER/HER2 | PURPLE |
| TCGA-A8-A08G | WT          | WHITE | Positive | Positive | Positive  | ER/HER2 | PURPLE |
| TCGA-A8-A090 | WT          | WHITE | Positive | Positive | Positive  | ER/HER2 | PURPLE |
| TCGA-E9-A1NA | WT          | WHITE | Positive | Positive | Positive  | ER/HER2 | PURPLE |
| TCGA-B6-A2IU | WT          | WHITE | Positive | Positive | NA        | ER/HER2 | PURPLE |
| TCGA-B6-A0WW | WT          | WHITE | Positive | Positive | NA        | ER/HER2 | PURPLE |
| TCGA-BH-A0B4 | WT          | WHITE | Positive | Positive | Positive  | ER/HER2 | PURPLE |
| TCGA-B6-A0IB | WT          | WHITE | Positive | Positive | NA        | ER/HER2 | PURPLE |
| TCGA-AN-A0FD | WT          | WHITE | Positive | Positive | Positive  | ER/HER2 | PURPLE |
| TCGA-E2-A15H | WT          | WHITE | Positive | Positive | Positive  | ER/HER2 | PURPLE |
| TCGA-A8-A08P | WT          | WHITE | Positive | Positive | Positive  | ER/HER2 | PURPLE |
| TCGA-A8-A076 | WT          | WHITE | Positive | Positive | Positive  | ER/HER2 | PURPLE |
| TCGA-BH-A1EV | WT          | WHITE | Positive | Positive | Positive  | ER/HER2 | PURPLE |
| TCGA-A1-A0SM | WT          | WHITE | Positive | Negative | Positive  | ER/HER2 | PURPLE |
| TCGA-AR-A255 | WT          | WHITE | Positive | Positive | Positive  | ER/HER2 | PURPLE |
| TCGA-A8-A09E | WT          | WHITE | Positive | Positive | Positive  | ER/HER2 | PURPLE |
| TCGA-B6-A0IA | WT          | WHITE | Positive | Positive | NA        | ER/HER2 | PURPLE |
| TCGA-AO-A0JL | R306*       | RED   | Negative | Negative | Positive  | HER2    | BLUE   |
| TCGA-A8-A08X | C176F       | RED   | Negative | Negative | Positive  | HER2    | BLUE   |
| TCGA-D8-A1XT | A276P       | RED   | Negative | Negative | Positive  | HER2    | BLUE   |
| TCGA-C8-A12P | R248W       | RED   | Negative | Negative | Positive  | HER2    | BLUE   |
| TCGA-A2-A0D1 | Q331*       | RED   | Negative | Negative | Positive  | HER2    | BLUE   |
| TCGA-C8-A135 | S241fs      | RED   | Negative | Negative | Positive  | HER2    | BLUE   |
| TCGA-AN-A0FV | L252P       | RED   | Negative | Negative | Positive  | HER2    | BLUE   |
| TCGA-C8-A278 | H168P       | RED   | Negative | Negative | Positive  | HER2    | BLUE   |
| TCGA-AN-A0FL | V225_splice | RED   | Negative | Negative | Positive  | HER2    | BLUE   |
| TCGA-E9-A1ND | Y220C       | RED   | Negative | Negative | Positive  | HER2    | BLUE   |
| TCGA-E2-A1B0 | K132N       | RED   | Negative | Negative | Positive  | HER2    | BLUE   |
| TCGA-C8-A12Z | R342P       | RED   | Negative | Negative | Positive  | HER2    | BLUE   |
| TCGA-AN-A0FX | R248W       | RED   | Negative | Negative | Positive  | HER2    | BLUE   |
| TCGA-C8-A12Q | Y205N       | RED   | Negative | Negative | Positive  | HER2    | BLUE   |
| TCGA-AO-A12D | S241fs      | RED   | Negative | Negative | Positive  | HER2    | BLUE   |
| TCGA-A2-A0T1 | R273C       | RED   | Negative | Negative | Positive  | HER2    | BLUE   |
| TCGA-EW-A2FR | R175H       | RED   | Negative | Negative | Positive  | HER2    | BLUE   |

|              |            |       |          |          |          |      |       |
|--------------|------------|-------|----------|----------|----------|------|-------|
| TCGA-E2-A1LE | K164E      | RED   | Negative | Negative | Positive | HER2 | BLUE  |
| TCGA-A2-A04W | V272M      | RED   | Negative | Negative | Positive | HER2 | BLUE  |
| TCGA-AN-A04C | WT         | WHITE | Negative | Negative | Positive | HER2 | BLUE  |
| TCGA-AR-A24U | WT         | WHITE | Negative | Negative | Positive | HER2 | BLUE  |
| TCGA-E9-A1NC | WT         | WHITE | Negative | Positive | Positive | HER2 | BLUE  |
| TCGA-AO-A0JE | WT         | WHITE | Negative | Negative | Positive | HER2 | BLUE  |
| TCGA-D8-A1JA | WT         | WHITE | Negative | Negative | Positive | HER2 | BLUE  |
| TCGA-A8-A0A7 | WT         | WHITE | Negative | Negative | Positive | HER2 | BLUE  |
| TCGA-BH-A1EN | WT         | WHITE | Negative | Negative | Positive | HER2 | BLUE  |
| TCGA-E2-A1LB | WT         | WHITE | Negative | Negative | Positive | HER2 | BLUE  |
| TCGA-A8-A092 | C238Y      | RED   | Positive | Positive | Negative | ER   | GREEN |
| TCGA-A2-A0SV | FLH113del  | RED   | Positive | Positive | Negative | ER   | GREEN |
| TCGA-A2-A0SW | R273C      | RED   | Positive | Negative | Negative | ER   | GREEN |
| TCGA-AR-A0U3 | Q167fs     | RED   | Positive | Positive | Negative | ER   | GREEN |
| TCGA-D8-A1JJ | C141Y      | RED   | Positive | Positive | Negative | ER   | GREEN |
| TCGA-A8-A06O | G279E      | RED   | Positive | Positive | Negative | ER   | GREEN |
| TCGA-A8-A06Q | C238Y      | RED   | Positive | Positive | Negative | ER   | GREEN |
| TCGA-A8-A07W | H179R      | RED   | Positive | Positive | Negative | ER   | GREEN |
| TCGA-A2-A0YT | I255S      | RED   | Positive | Negative | Negative | ER   | GREEN |
| TCGA-AR-A24K | F109fs     | RED   | Positive | Positive | Negative | ER   | GREEN |
| TCGA-A7-A0CJ | R175H      | RED   | Positive | Positive | Negative | ER   | GREEN |
| TCGA-C8-A12W | H193Y      | RED   | Positive | Positive | Negative | ER   | GREEN |
| TCGA-A2-A0YH | P278L      | RED   | Positive | Positive | Negative | ER   | GREEN |
| TCGA-EW-A1OY | Q192*      | RED   | Positive | Positive | Negative | ER   | GREEN |
| TCGA-D8-A1XL | R248W      | RED   | Positive | Positive | Negative | ER   | GREEN |
| TCGA-AO-A0JB | R213*      | RED   | Positive | Positive | Negative | ER   | GREEN |
| TCGA-A8-A081 | C141Y      | RED   | Positive | Positive | Negative | ER   | GREEN |
| TCGA-E2-A155 | S33_splice | RED   | Positive | Negative | Negative | ER   | GREEN |
| TCGA-AR-A24S | D281V      | RED   | Positive | Positive | Negative | ER   | GREEN |
| TCGA-E2-A15M | L130V      | RED   | Positive | Positive | Negative | ER   | GREEN |
| TCGA-BH-A0GY | R175H      | RED   | Positive | Positive | Negative | ER   | GREEN |
| TCGA-A8-A08I | Y163C      | RED   | Positive | Positive | Negative | ER   | GREEN |
| TCGA-BH-A0DL | E286A      | RED   | Positive | Negative | Negative | ER   | GREEN |
| TCGA-A2-A0YJ | R342*      | RED   | Positive | Negative | Negative | ER   | GREEN |
| TCGA-A8-A06Z | P128fs     | RED   | Positive | Positive | Negative | ER   | GREEN |
| TCGA-E2-A2P5 | F341S      | RED   | Positive | Positive | Negative | ER   | GREEN |
| TCGA-BH-A0BR | V274F      | RED   | Positive | Positive | Negative | ER   | GREEN |
| TCGA-BH-A1FD | V173L      | RED   | Positive | Positive | Negative | ER   | GREEN |
| TCGA-GM-A2DL | D281E      | RED   | Positive | Positive | Negative | ER   | GREEN |
| TCGA-C8-A12O | R273H      | RED   | Positive | Positive | Negative | ER   | GREEN |
| TCGA-AR-A24P | Y234C      | RED   | Positive | Positive | Negative | ER   | GREEN |
| TCGA-A1-A0SI | R175H      | RED   | Positive | Positive | Negative | ER   | GREEN |
| TCGA-AO-A03N | A161T      | RED   | Positive | Positive | Negative | ER   | GREEN |
| TCGA-C8-A26V | I232S      | RED   | Positive | Positive | Negative | ER   | GREEN |
| TCGA-D8-A1XZ | Q167*      | RED   | Positive | Negative | Negative | ER   | GREEN |
| TCGA-BH-A0HX | C135W      | RED   | Positive | Positive | Negative | ER   | GREEN |
| TCGA-BH-A0BD | WT         | WHITE | Positive | Positive | Negative | ER   | GREEN |
| TCGA-BH-A0H0 | WT         | WHITE | Positive | Positive | Negative | ER   | GREEN |



|              |    |       |          |          |          |    |       |
|--------------|----|-------|----------|----------|----------|----|-------|
| TCGA-D8-A1J8 | WT | WHITE | Positive | Positive | Negative | ER | GREEN |
| TCGA-AN-A03Y | WT | WHITE | Positive | Positive | Negative | ER | GREEN |
| TCGA-A2-A0T3 | WT | WHITE | Positive | Positive | Negative | ER | GREEN |
| TCGA-A8-A095 | WT | WHITE | Positive | Positive | Negative | ER | GREEN |
| TCGA-A8-A07E | WT | WHITE | Positive | Positive | Negative | ER | GREEN |
| TCGA-AR-A2LK | WT | WHITE | Positive | Positive | Negative | ER | GREEN |
| TCGA-D8-A1JD | WT | WHITE | Positive | Positive | Negative | ER | GREEN |
| TCGA-AN-A0XW | WT | WHITE | Positive | Positive | Negative | ER | GREEN |
| TCGA-BH-A0E1 | WT | WHITE | Positive | Positive | Negative | ER | GREEN |
| TCGA-BH-A0E2 | WT | WHITE | Positive | Positive | Negative | ER | GREEN |
| TCGA-E9-A22A | WT | WHITE | Positive | Negative | Negative | ER | GREEN |
| TCGA-E2-A15A | WT | WHITE | Positive | Positive | Negative | ER | GREEN |
| TCGA-BH-A18F | WT | WHITE | Positive | Positive | Negative | ER | GREEN |
| TCGA-A8-A084 | WT | WHITE | Positive | Negative | Negative | ER | GREEN |
| TCGA-BH-A0B5 | WT | WHITE | Positive | Positive | Negative | ER | GREEN |
| TCGA-A7-A26J | WT | WHITE | Positive | Positive | Negative | ER | GREEN |
| TCGA-E2-A10A | WT | WHITE | Positive | Positive | Negative | ER | GREEN |
| TCGA-A2-A1FX | WT | WHITE | Positive | Positive | Negative | ER | GREEN |
| TCGA-AR-A24L | WT | WHITE | Positive | Positive | Negative | ER | GREEN |
| TCGA-BH-A0AU | WT | WHITE | Positive | Positive | Negative | ER | GREEN |
| TCGA-AR-A24R | WT | WHITE | Positive | Positive | Negative | ER | GREEN |
| TCGA-E2-A15R | WT | WHITE | Positive | Positive | Negative | ER | GREEN |
| TCGA-BH-A0BZ | WT | WHITE | Positive | Positive | Negative | ER | GREEN |
| TCGA-AO-A03M | WT | WHITE | Positive | Positive | Negative | ER | GREEN |
| TCGA-AR-A1AO | WT | WHITE | Positive | Negative | Negative | ER | GREEN |
| TCGA-A2-A04R | WT | WHITE | Positive | Positive | Negative | ER | GREEN |
| TCGA-D8-A1JC | WT | WHITE | Positive | Positive | Negative | ER | GREEN |
| TCGA-D8-A1Y0 | WT | WHITE | Positive | Positive | Negative | ER | GREEN |
| TCGA-AO-A1KS | WT | WHITE | Positive | Positive | Negative | ER | GREEN |
| TCGA-AO-A1KT | WT | WHITE | Positive | Positive | Negative | ER | GREEN |
| TCGA-A2-A0CL | WT | WHITE | Positive | Positive | Negative | ER | GREEN |
| TCGA-BH-A18L | WT | WHITE | Positive | Positive | Negative | ER | GREEN |
| TCGA-A2-A1FW | WT | WHITE | Positive | Negative | Negative | ER | GREEN |
| TCGA-A2-A25C | WT | WHITE | Positive | Positive | Negative | ER | GREEN |
| TCGA-E2-A1LA | WT | WHITE | Positive | Positive | Negative | ER | GREEN |
| TCGA-D8-A27R | WT | WHITE | Positive | Positive | Negative | ER | GREEN |
| TCGA-D8-A1JT | WT | WHITE | Positive | Positive | Negative | ER | GREEN |
| TCGA-AR-A24N | WT | WHITE | Positive | Positive | Negative | ER | GREEN |
| TCGA-AR-A24Z | WT | WHITE | Positive | Positive | Negative | ER | GREEN |
| TCGA-AO-A0J7 | WT | WHITE | Positive | Positive | Negative | ER | GREEN |
| TCGA-E2-A10C | WT | WHITE | Positive | Positive | Negative | ER | GREEN |
| TCGA-E2-A107 | WT | WHITE | Positive | Negative | Negative | ER | GREEN |
| TCGA-E2-A15O | WT | WHITE | Positive | Positive | Negative | ER | GREEN |
| TCGA-AN-A0XR | WT | WHITE | Positive | Negative | Negative | ER | GREEN |
| TCGA-A8-A082 | WT | WHITE | Positive | Positive | Negative | ER | GREEN |
| TCGA-E2-A14S | WT | WHITE | Positive | Positive | Negative | ER | GREEN |
| TCGA-GM-A2DO | WT | WHITE | Positive | Positive | Negative | ER | GREEN |
| TCGA-A2-A04V | WT | WHITE | Positive | Positive | Negative | ER | GREEN |

|              |    |       |          |          |          |    |       |
|--------------|----|-------|----------|----------|----------|----|-------|
| TCGA-AO-A03T | WT | WHITE | Positive | Positive | Negative | ER | GREEN |
| TCGA-C8-A273 | WT | WHITE | Positive | Positive | Negative | ER | GREEN |
| TCGA-A8-A07Z | WT | WHITE | Positive | Positive | Negative | ER | GREEN |
| TCGA-BH-A0W3 | WT | WHITE | Positive | Positive | Negative | ER | GREEN |
| TCGA-E2-A14Z | WT | WHITE | Positive | Positive | Negative | ER | GREEN |
| TCGA-AO-A12E | WT | WHITE | Positive | Positive | Negative | ER | GREEN |
| TCGA-E2-A14T | WT | WHITE | Positive | Positive | Negative | ER | GREEN |
| TCGA-A2-A1G4 | WT | WHITE | Positive | Positive | Negative | ER | GREEN |
| TCGA-C8-A1HO | WT | WHITE | Positive | Positive | Negative | ER | GREEN |
| TCGA-E2-A1IE | WT | WHITE | Positive | Positive | Negative | ER | GREEN |
| TCGA-A2-A0YF | WT | WHITE | Positive | Negative | Negative | ER | GREEN |
| TCGA-A8-A09M | WT | WHITE | Positive | Positive | Negative | ER | GREEN |
| TCGA-A8-A085 | WT | WHITE | Positive | Positive | Negative | ER | GREEN |
| TCGA-E2-A15T | WT | WHITE | Positive | Positive | Negative | ER | GREEN |
| TCGA-A2-A0ER | WT | WHITE | Positive | Positive | Negative | ER | GREEN |
| TCGA-E2-A2P6 | WT | WHITE | Positive | Positive | Negative | ER | GREEN |
| TCGA-A8-A09R | WT | WHITE | Positive | Positive | Negative | ER | GREEN |
| TCGA-D8-A1XM | WT | WHITE | Positive | Positive | Negative | ER | GREEN |
| TCGA-A2-A0EV | WT | WHITE | Positive | Positive | Negative | ER | GREEN |
| TCGA-E9-A1NE | WT | WHITE | Positive | Positive | Negative | ER | GREEN |
| TCGA-BH-A0HK | WT | WHITE | Positive | Negative | Negative | ER | GREEN |
| TCGA-D8-A1Y1 | WT | WHITE | Positive | Positive | Negative | ER | GREEN |
| TCGA-E9-A1NI | WT | WHITE | Positive | Positive | Negative | ER | GREEN |
| TCGA-A2-A0T4 | WT | WHITE | Positive | Positive | Negative | ER | GREEN |
| TCGA-AO-A1KP | WT | WHITE | Positive | Positive | Negative | ER | GREEN |
| TCGA-A2-A04Y | WT | WHITE | Positive | Positive | Negative | ER | GREEN |
| TCGA-D8-A1JP | WT | WHITE | Positive | Positive | Negative | ER | GREEN |
| TCGA-AO-A0J3 | WT | WHITE | Positive | Positive | Negative | ER | GREEN |
| TCGA-BH-A0DK | WT | WHITE | Positive | Positive | Negative | ER | GREEN |
| TCGA-A2-A25D | WT | WHITE | Positive | Negative | Negative | ER | GREEN |
| TCGA-C8-A274 | WT | WHITE | Positive | Positive | Negative | ER | GREEN |
| TCGA-C8-A26Z | WT | WHITE | Positive | Positive | Negative | ER | GREEN |
| TCGA-A1-A0SJ | WT | WHITE | Positive | Positive | Negative | ER | GREEN |
| TCGA-A8-A08J | WT | WHITE | Positive | Negative | Negative | ER | GREEN |
| TCGA-A8-A09Q | WT | WHITE | Positive | Positive | Negative | ER | GREEN |
| TCGA-B6-A1KC | WT | WHITE | Positive | Negative | Negative | ER | GREEN |
| TCGA-AN-A049 | WT | WHITE | Positive | Positive | Negative | ER | GREEN |
| TCGA-EW-A1IY | WT | WHITE | Positive | Positive | Negative | ER | GREEN |
| TCGA-AN-A04A | WT | WHITE | Positive | Positive | Negative | ER | GREEN |
| TCGA-AO-A0JA | WT | WHITE | Positive | Positive | Negative | ER | GREEN |
| TCGA-A8-A09C | WT | WHITE | Positive | Positive | Negative | ER | GREEN |
| TCGA-D8-A1X9 | WT | WHITE | Positive | Positive | Negative | ER | GREEN |
| TCGA-A8-A09A | WT | WHITE | Positive | Positive | Negative | ER | GREEN |
| TCGA-A2-A0CT | WT | WHITE | Positive | Negative | Negative | ER | GREEN |
| TCGA-E9-A22B | WT | WHITE | Positive | Negative | Negative | ER | GREEN |
| TCGA-E2-A14O | WT | WHITE | Positive | Positive | Negative | ER | GREEN |
| TCGA-AC-A2BM | WT | WHITE | Positive | Positive | Negative | ER | GREEN |
| TCGA-A8-A086 | WT | WHITE | Positive | Positive | Negative | ER | GREEN |

|              |             |       |          |               |          |      |       |
|--------------|-------------|-------|----------|---------------|----------|------|-------|
| TCGA-A2-A0D3 | WT          | WHITE | Positive | Positive      | Negative | ER   | GREEN |
| TCGA-EW-A1IZ | WT          | WHITE | Positive | Positive      | Negative | ER   | GREEN |
| TCGA-EW-A2FS | WT          | WHITE | Positive | Negative      | Negative | ER   | GREEN |
| TCGA-A2-A0CU | WT          | WHITE | Positive | Positive      | Negative | ER   | GREEN |
| TCGA-D8-A1Y2 | WT          | WHITE | Positive | Positive      | Negative | ER   | GREEN |
| TCGA-B6-A0IN | WT          | WHITE | Positive | Negative      | NA       | ER   | GREEN |
| TCGA-AO-A03V | WT          | WHITE | Positive | Positive      | Negative | ER   | GREEN |
| TCGA-AR-A2LN | WT          | WHITE | Positive | Positive      | Negative | ER   | GREEN |
| TCGA-EW-A1J6 | WT          | WHITE | Positive | Positive      | Negative | ER   | GREEN |
| TCGA-A7-A0DA | I195T       | RED   | Negative | Negative      | Negative | TNBC | RED   |
| TCGA-E9-A1N8 | T256fs      | RED   | Negative | NA            | Negative | TNBC | RED   |
| TCGA-A2-A0SX | G199V       | RED   | Negative | Negative      | Negative | TNBC | RED   |
| TCGA-E2-A1LH | K132T       | RED   | Negative | Negative      | Negative | TNBC | RED   |
| TCGA-GM-A2DF | V225_splice | RED   | Negative | Negative      | Negative | TNBC | RED   |
| TCGA-A2-A04P | G108fs      | RED   | Negative | Negative      | Negative | TNBC | RED   |
| TCGA-BH-A1FU | R175H       | RED   | Negative | Negative      | NA       | TNBC | RED   |
| TCGA-D8-A1JK | Q331_splice | RED   | Negative | Positive      | Negative | TNBC | RED   |
| TCGA-AO-A128 | R342*       | RED   | Negative | Negative      | Negative | TNBC | RED   |
| TCGA-AC-A2QH | D281Y       | RED   | Negative | Negative      | Negative | TNBC | RED   |
| TCGA-A8-A09X | M246I       | RED   | Negative | Negative      | Negative | TNBC | RED   |
| TCGA-D8-A142 | P278A       | RED   | Negative | Negative      | Negative | TNBC | RED   |
| TCGA-D8-A27M | R196*       | RED   | Negative | Negative      | Negative | TNBC | RED   |
| TCGA-E9-A243 | W91*,Y220S  | RED   | NA       | NA            | NA       | TNBC | RED   |
| TCGA-BH-A0BL | P151H       | RED   | Negative | Negative      | Negative | TNBC | RED   |
| TCGA-D8-A1JG | L289F       | RED   | Negative | Negative      | Negative | TNBC | RED   |
| TCGA-E2-A150 | C176*       | RED   | Negative | Negative      | Negative | TNBC | RED   |
| TCGA-BH-A0RX | R342*       | RED   | Negative | Negative      | Negative | TNBC | RED   |
| TCGA-BH-A0BG | L201fs      | RED   | Negative | Negative      | Negative | TNBC | RED   |
| TCGA-A7-A26G | Y220H       | RED   | Negative | Negative      | Negative | TNBC | RED   |
| TCGA-BH-A1F0 | V147fs      | RED   | Negative | Indeterminate | Negative | TNBC | RED   |
| TCGA-E2-A14X | R213*       | RED   | Negative | Negative      | Negative | TNBC | RED   |
| TCGA-BH-A18Q | A76fs       | RED   | Negative | Negative      | Negative | TNBC | RED   |
| TCGA-AQ-A04J | L111P       | RED   | Negative | Negative      | Negative | TNBC | RED   |
| TCGA-GM-A2DB | E294*       | RED   | Negative | Negative      | Negative | TNBC | RED   |
| TCGA-A2-A0T2 | Y220C       | RED   | Negative | Negative      | Negative | TNBC | RED   |
| TCGA-C8-A26X | V173M       | RED   | Negative | Negative      | Negative | TNBC | RED   |
| TCGA-D8-A1JF | H179R       | RED   | Negative | Negative      | Negative | TNBC | RED   |
| TCGA-D8-A1XW | Y126N       | RED   | Negative | Positive      | Negative | TNBC | RED   |
| TCGA-GM-A2DD | R175H       | RED   | Negative | Negative      | Negative | TNBC | RED   |
| TCGA-E2-A158 | I195T       | RED   | Negative | Negative      | Negative | TNBC | RED   |
| TCGA-D8-A27H | WT          | WHITE | Negative | Negative      | Negative | TNBC | RED   |
| TCGA-C8-A26Y | WT          | WHITE | Negative | Negative      | Negative | TNBC | RED   |
| TCGA-A2-A04Q | WT          | WHITE | Negative | Negative      | Negative | TNBC | RED   |
| TCGA-BH-A0BW | WT          | WHITE | Negative | Negative      | Negative | TNBC | RED   |
| TCGA-A2-A25F | WT          | WHITE | Negative | Positive      | Negative | TNBC | RED   |
| TCGA-A2-A0ST | WT          | WHITE | Negative | Negative      | Negative | TNBC | RED   |
| TCGA-C8-A12V | WT          | WHITE | Negative | Negative      | Negative | TNBC | RED   |
| TCGA-AC-A2QJ | WT          | WHITE | Negative | Negative      | Negative | TNBC | RED   |

|              |             |       |          |          |          |      |       |
|--------------|-------------|-------|----------|----------|----------|------|-------|
| TCGA-BH-A18G | WT          | WHITE | Negative | Negative | Negative | TNBC | RED   |
| TCGA-BH-A1EW | WT          | WHITE | Negative | Negative | Negative | TNBC | RED   |
| TCGA-A2-A3XS | S241fs      | RED   | NA       | NA       | NA       | NA   | WHITE |
| TCGA-EW-A3U0 | E204*       | RED   | NA       | NA       | NA       | NA   | WHITE |
| TCGA-E9-A5FL | H193R       | RED   | NA       | NA       | NA       | NA   | WHITE |
| TCGA-B6-A0IK | L194R       | RED   | Negative | Negative | NA       | NA   | WHITE |
| TCGA-A2-A3XY | G187_splice | RED   | NA       | NA       | NA       | NA   | WHITE |
| TCGA-LL-A5YP | R280K       | RED   | NA       | NA       | NA       | NA   | WHITE |
| TCGA-A7-A4SD | M237I       | RED   | NA       | NA       | NA       | NA   | WHITE |
| TCGA-AC-A62X | I195T       | RED   | NA       | NA       | NA       | NA   | WHITE |
| TCGA-AR-A0U0 | L194R       | RED   | Negative | Negative | NA       | NA   | WHITE |
| TCGA-GI-A2C9 | C176Y       | RED   | NA       | NA       | NA       | NA   | WHITE |
| TCGA-B6-A3ZX | V216M       | RED   | NA       | NA       | NA       | NA   | WHITE |
| TCGA-B6-A0WX | L114*,R248W | RED   | Negative | Negative | NA       | NA   | WHITE |
| TCGA-B6-A1KN | L265P       | RED   | Negative | Negative | NA       | NA   | WHITE |
| TCGA-AC-A5XU | R342P       | RED   | NA       | NA       | NA       | NA   | WHITE |
| TCGA-A7-A56D | T304fs      | RED   | NA       | NA       | NA       | NA   | WHITE |
| TCGA-AQ-A54N | R306*       | RED   | NA       | NA       | NA       | NA   | WHITE |
| TCGA-A2-A3XV | C135F       | RED   | NA       | NA       | NA       | NA   | WHITE |
| TCGA-B6-A0IE | A307_splice | RED   | Negative | Negative | NA       | NA   | WHITE |
| TCGA-A7-A4SA | P151A       | RED   | NA       | NA       | NA       | NA   | WHITE |
| TCGA-JL-A3YW | E51*        | RED   | NA       | NA       | NA       | NA   | WHITE |
| TCGA-AN-A0XN | Y126_splice | RED   | Negative | Positive | Negative | NA   | WHITE |
| TCGA-A7-A5ZV | T211fs      | RED   | NA       | NA       | NA       | NA   | WHITE |
| TCGA-E9-A3HO | WT          | WHITE | NA       | NA       | NA       | NA   | WHITE |
| TCGA-LL-A5YM | WT          | WHITE | NA       | NA       | NA       | NA   | WHITE |
| TCGA-E9-A1RG | WT          | WHITE | NA       | NA       | NA       | NA   | WHITE |
| TCGA-OL-A5RZ | WT          | WHITE | NA       | NA       | NA       | NA   | WHITE |
| TCGA-E9-A1RF | WT          | WHITE | NA       | NA       | NA       | NA   | WHITE |
| TCGA-E9-A247 | WT          | WHITE | NA       | NA       | NA       | NA   | WHITE |
| TCGA-LL-A441 | WT          | WHITE | NA       | NA       | NA       | NA   | WHITE |
| TCGA-PE-A5DC | WT          | WHITE | NA       | NA       | NA       | NA   | WHITE |
| TCGA-E9-A226 | WT          | WHITE | NA       | NA       | NA       | NA   | WHITE |
| TCGA-BH-A204 | WT          | WHITE | NA       | NA       | NA       | NA   | WHITE |
| TCGA-B6-A0RG | WT          | WHITE | Negative | Negative | NA       | NA   | WHITE |
| TCGA-A7-A4SF | WT          | WHITE | NA       | NA       | NA       | NA   | WHITE |
| TCGA-E2-A56Z | WT          | WHITE | NA       | NA       | NA       | NA   | WHITE |
| TCGA-JL-A3YX | WT          | WHITE | NA       | NA       | NA       | NA   | WHITE |
| TCGA-AC-A3W5 | WT          | WHITE | NA       | NA       | NA       | NA   | WHITE |
| TCGA-B6-A40C | WT          | WHITE | NA       | NA       | NA       | NA   | WHITE |
| TCGA-LQ-A4E4 | WT          | WHITE | NA       | NA       | NA       | NA   | WHITE |
| TCGA-AC-A3TM | WT          | WHITE | NA       | NA       | NA       | NA   | WHITE |
| TCGA-LL-A5YL | WT          | WHITE | NA       | NA       | NA       | NA   | WHITE |
| TCGA-BH-A2L8 | WT          | WHITE | NA       | NA       | NA       | NA   | WHITE |
| TCGA-AC-A2FM | WT          | WHITE | NA       | NA       | NA       | NA   | WHITE |
| TCGA-C8-A3M8 | WT          | WHITE | NA       | NA       | NA       | NA   | WHITE |
| TCGA-A2-A3XZ | WT          | WHITE | NA       | NA       | NA       | NA   | WHITE |
| TCGA-OK-A5Q2 | WT          | WHITE | NA       | NA       | NA       | NA   | WHITE |

|              |    |       |    |    |    |    |       |
|--------------|----|-------|----|----|----|----|-------|
| TCGA-A2-A4RX | WT | WHITE | NA | NA | NA | NA | WHITE |
| TCGA-E9-A249 | WT | WHITE | NA | NA | NA | NA | WHITE |
| TCGA-E9-A1QZ | WT | WHITE | NA | NA | NA | NA | WHITE |
| TCGA-E9-A1RE | WT | WHITE | NA | NA | NA | NA | WHITE |
| TCGA-B6-A0I2 | WT | WHITE | NA | NA | NA | NA | WHITE |
| TCGA-E9-A1R7 | WT | WHITE | NA | NA | NA | NA | WHITE |

---

|

## Reference List

- (1) Chen S, Chen Y, Hu C, Jing H, Cao Y, Liu X. Association of clinicopathological features with UbcH10 expression in colorectal cancer. *J Cancer Res Clin Oncol* 2010 March;136(3):419-26.
- (2) Jiang L, Bao Y, Luo C et al. Knockdown of ubiquitin-conjugating enzyme E2C/UbcH10 expression by RNA interference inhibits glioma cell proliferation and enhances cell apoptosis in vitro. *J Cancer Res Clin Oncol* 2010 February;136(2):211-7.
- (3) Shimo A, Tanikawa C, Nishidate T et al. Involvement of kinesin family member 2C/mitotic centromere-associated kinesin overexpression in mammary carcinogenesis. *Cancer Sci* 2008 January;99(1):62-70.
- (4) Nakamura Y, Tanaka F, Haraguchi N et al. Clinicopathological and biological significance of mitotic centromere-associated kinesin overexpression in human gastric cancer. *Br J Cancer* 2007 August 20;97(4):543-9.
- (5) Yim EK, Tong SY, Ho EM, Bae JH, Um SJ, Park JS. Anticancer effects on TACC3 by treatment of paclitaxel in HPV-18 positive cervical carcinoma cells. *Oncol Rep* 2009 February;21(2):549-57.
- (6) Zhang SH, Xu AM, Chen XF, Li DH, Sun MP, Wang YJ. Clinicopathologic significance of mitotic arrest defective protein 2 overexpression in hepatocellular carcinoma. *Hum Pathol* 2008 December;39(12):1827-34.
- (7) Shang X, Burlingame SM, Okcu MF et al. Aurora A is a negative prognostic factor and a new therapeutic target in human neuroblastoma. *Mol Cancer Ther* 2009 August;8(8):2461-9.
- (8) Inoda S, Hirohashi Y, Torigoe T et al. Cep55/c10orf3, a tumor antigen derived from a centrosome residing protein in breast carcinoma. *J Immunother* 2009 June;32(5):474-85.
- (9) Chen CH, Chien CY, Huang CC et al. Expression of FLJ10540 is correlated with aggressiveness of oral cavity squamous cell carcinoma by stimulating cell migration and invasion through increased FOXM1 and MMP-2 activity. *Oncogene* 2009 July 30;28(30):2723-37.
- (10) Zheng H, Hu W, Deavers MT et al. Nuclear cyclin B1 is overexpressed in low-malignant-potential ovarian tumors but not in epithelial ovarian cancer. *Am J Obstet Gynecol* 2009 October;201(4):367-6.
- (11) de HT, Hasselt N, Troost D et al. Molecular risk stratification of medulloblastoma patients based on immunohistochemical analysis of MYC, LDHB, and CCNB1 expression. *Clin Cancer Res* 2008 July 1;14(13):4154-60.
- (12) Zhang K, Hu S, Wu J et al. Overexpression of RRM2 decreases thrombospondin-1 and increases VEGF production in human cancer cells in vitro and in vivo: implication of RRM2 in angiogenesis. *Mol Cancer* 2009;8:11.
- (13) Duxbury MS, Ito H, Zinner MJ, Ashley SW, Whang EE. RNA interference targeting the M2 subunit of ribonucleotide reductase enhances pancreatic adenocarcinoma chemosensitivity to gemcitabine. *Oncogene* 2004 February 26;23(8):1539-48.

- (14) Boukovinas I, Papadaki C, Mendez P et al. Tumor BRCA1, RRM1 and RRM2 mRNA expression levels and clinical response to first-line gemcitabine plus docetaxel in non-small-cell lung cancer patients. *PLoS One* 2008;3(11):e3695.
- (15) Zhao L, Qin LX, Ye QH et al. KIAA0008 gene is associated with invasive phenotype of human hepatocellular carcinoma--a functional analysis. *J Cancer Res Clin Oncol* 2004 December;130(12):719-27.
- (16) Szponar A, Zubakov D, Pawlak J, Jauch A, Kovacs G. Three genetic developmental stages of papillary renal cell tumors: duplication of chromosome 1q marks fatal progression. *Int J Cancer* 2009 May 1;124(9):2071-6.
- (17) Tsunoda N, Kokuryo T, Oda K et al. Nek2 as a novel molecular target for the treatment of breast carcinoma. *Cancer Sci* 2009 January;100(1):111-6.
- (18) Xiao GF, Tang HH. [Expression and clinical significance of highly expressed protein in cancer (Hec 1) in human primary gallbladder carcinoma]. *Xi Bao Yu Fen Zi Mian Yi Xue Za Zhi* 2008 September;24(9):910-2.
- (19) Chen MF, Lee KD, Lu MS et al. The predictive role of E2-EPF ubiquitin carrier protein in esophageal squamous cell carcinoma. *J Mol Med* 2009 March;87(3):307-20.
- (20) Park SH, Yu GR, Kim WH, Moon WS, Kim JH, Kim DG. NF-Y-dependent cyclin B2 expression in colorectal adenocarcinoma. *Clin Cancer Res* 2007 February 1;13(3):858-67.
- (21) Taniuchi K, Nakagawa H, Nakamura T et al. Down-regulation of RAB6KIFL/KIF20A, a kinesin involved with membrane trafficking of discs large homologue 5, can attenuate growth of pancreatic cancer cell. *Cancer Res* 2005 January 1;65(1):105-12.
- (22) Kang JU, Koo SH, Kwon KC, Park JW, Kim JM. Gain at chromosomal region 5p15.33, containing TERT, is the most frequent genetic event in early stages of non-small cell lung cancer. *Cancer Genet Cytogenet* 2008 April 1;182(1):1-11.
- (23) Jiang R, Xia Y, Li J et al. High expression levels of IKKalpha and IKKbeta are necessary for the malignant properties of liver cancer. *Int J Cancer* 2010 March 1;126(5):1263-74.
- (24) Mitra A, Jameson C, Barbachano Y et al. Overexpression of RAD51 occurs in aggressive prostatic cancer. *Histopathology* 2009 December;55(6):696-704.
- (25) Dankof A, Fritzsche FR, Dahl E et al. KPNA2 protein expression in invasive breast carcinoma and matched peritumoral ductal carcinoma in situ. *Virchows Arch* 2007 November;451(5):877-81.
- (26) Naoe M, Ogawa Y, Morita J et al. Expression of the fluoropyrimidine-metabolizing enzymes in bladder cancers as measured by the Danenberg tumor profile. *Oncol Res* 2009;18(4):153-62.
- (27) Seo J, Chung YS, Sharma GG et al. Cdt1 transgenic mice develop lymphoblastic lymphoma in the absence of p53. *Oncogene* 2005 December 8;24(55):8176-86.
- (28) Singh P, Yang M, Dai H et al. Overexpression and hypomethylation of flap endonuclease 1 gene in breast and other cancers. *Mol Cancer Res* 2008 November;6(11):1710-7.

- (29) Arai M, Kondoh N, Imazeki N et al. The knockdown of endogenous replication factor C4 decreases the growth and enhances the chemosensitivity of hepatocellular carcinoma cells. *Liver Int* 2009 January;29(1):55-62.
- (30) Karanikolas BD, Figueiredo ML, Wu L. Comprehensive evaluation of the role of EZH2 in the growth, invasion, and aggression of a panel of prostate cancer cell lines. *Prostate* 2010 May 1;70(6):675-88.
- (31) Sugiura T, Nagano Y, Noguchi Y. DDX39, upregulated in lung squamous cell cancer, displays RNA helicase activities and promotes cancer cell growth. *Cancer Biol Ther* 2007 June;6(6):957-64.
- (32) Lee H, Kim D, Dan HC et al. Identification and characterization of putative tumor suppressor NGB, a GTP-binding protein that interacts with the neurofibromatosis 2 protein. *Mol Cell Biol* 2007 March;27(6):2103-19.
- (33) Ooe A, Kato K, Noguchi S. Possible involvement of CCT5, RGS3, and YKT6 genes up-regulated in p53-mutated tumors in resistance to docetaxel in human breast cancers. *Breast Cancer Res Treat* 2007 March;101(3):305-15.
- (34) Karmakar S, Foster EA, Smith CL. Estradiol downregulation of the tumor suppressor gene BTG2 requires estrogen receptor-alpha and the REA corepressor. *Int J Cancer* 2009 April 15;124(8):1841-51.
- (35) Cheng CJ, Lin YC, Tsai MT et al. SCUBE2 suppresses breast tumor cell proliferation and confers a favorable prognosis in invasive breast cancer. *Cancer Res* 2009 April 15;69(8):3634-41.
- (36) Wang Y, Ma Y, Lu B, Xu E, Huang Q, Lai M. Differential expression of mimecan and thioredoxin domain-containing protein 5 in colorectal adenoma and cancer: a proteomic study. *Exp Biol Med (Maywood)* 2007 October;232(9):1152-9.
- (37) Majid SM, Liss AS, You M, Bose HR. The suppression of SH3BGRL is important for v-Rel-mediated transformation. *Oncogene* 2006 February 2;25(5):756-68.
- (38) Shubbar E, Kovacs A, Hajizadeh S et al. Elevated cyclin B2 expression in invasive breast carcinoma is associated with unfavorable clinical outcome. *BMC Cancer* 2013;13:1.
- (39) Pollok S, Bauerschmidt C, Sanger J, Nasheuer HP, Grosse F. Human Cdc45 is a proliferation-associated antigen. *FEBS J* 2007 July;274(14):3669-84.
- (40) Takahashi S, Fusaki N, Ohta S et al. Downregulation of KIF23 suppresses glioma proliferation. *J Neurooncol* 2012 February;106(3):519-29.
- (41) Sircar K, Huang H, Hu L et al. Mitosis phase enrichment with identification of mitotic centromere-associated kinesin as a therapeutic target in castration-resistant prostate cancer. *PLoS One* 2012;7(2):e31259.
- (42) Shimo A, Nishidate T, Ohta T, Fukuda M, Nakamura Y, Katagiri T. Elevated expression of protein regulator of cytokinesis 1, involved in the growth of breast cancer cells. *Cancer Sci* 2007 February;98(2):174-81.
- (43) Zhao ZK, Wu WG, Chen L et al. Expression of Ubch10 in pancreatic ductal adenocarcinoma and its correlation with prognosis. *Tumour Biol* 2013 June;34(3):1473-7.



- (44) Fristrup N, Birkenkamp-Demtroder K, Reinert T et al. Multicenter validation of cyclin D1, MCM7, TRIM29, and UBE2C as prognostic protein markers in non-muscle-invasive bladder cancer. *Am J Pathol* 2013 February;182(2):339-49.
- (45) Wang WY, Hsu CC, Wang TY et al. A gene expression signature of epithelial tubulogenesis and a role for ASPM in pancreatic tumor progression. *Gastroenterology* 2013 November;145(5):1110-20.
- (46) Jiang BY, Zhang XC, Su J et al. BCL11A overexpression predicts survival and relapse in non-small cell lung cancer and is modulated by microRNA-30a and gene amplification. *Mol Cancer* 2013;12:61.
- (47) Sun XP, Dong X, Lin L et al. Up-regulation of survivin by AKT and hypoxia-inducible factor 1alpha contributes to cisplatin resistance in gastric cancer. *FEBS J* 2014 January;281(1):115-28.
- (48) Hayama S, Daigo Y, Yamabuki T et al. Phosphorylation and activation of cell division cycle associated 8 by aurora kinase B plays a significant role in human lung carcinogenesis. *Cancer Res* 2007 May 1;67(9):4113-22.
- (49) Mi YJ, Gao J, Xie JD et al. Prognostic relevance and therapeutic implications of centromere protein F expression in patients with esophageal squamous cell carcinoma. *Dis Esophagus* 2013 August;26(6):636-43.
- (50) Dai Y, Liu L, Zeng T et al. Characterization of the oncogenic function of centromere protein F in hepatocellular carcinoma. *Biochem Biophys Res Commun* 2013 July 12;436(4):711-8.
- (51) Mascareno EJ, Belashov I, Siddiqui MA, Liu F, Dhar-Mascareno M. Hexim-1 modulates androgen receptor and the TGF-beta signaling during the progression of prostate cancer. *Prostate* 2012 June 15;72(9):1035-44.
- (52) Stypula-Cyrus Y, Mutyal NN, Dela CM et al. End-binding protein 1 (EB1) up-regulation is an early event in colorectal carcinogenesis. *FEBS Lett* 2014 March 3;588(5):829-35.
- (53) Zhang G, Zhang Z, Liu Z. Polo-like kinase 1 is overexpressed in renal cancer and participates in the proliferation and invasion of renal cancer cells. *Tumour Biol* 2013 June;34(3):1887-94.
- (54) Hardy S, Wong NN, Muller WJ, Park M, Tremblay ML. Overexpression of the protein tyrosine phosphatase PRL-2 correlates with breast tumor formation and progression. *Cancer Res* 2010 November 1;70(21):8959-67.
- (55) Demeure MJ, Coan KE, Grant CS et al. PTTG1 overexpression in adrenocortical cancer is associated with poor survival and represents a potential therapeutic target. *Surgery* 2013 December;154(6):1405-16.
- (56) Ke B, Wu LL, Liu N, Zhang RP, Wang CL, Liang H. Overexpression of stathmin 1 is associated with poor prognosis of patients with gastric cancer. *Tumour Biol* 2013 October;34(5):3137-45.
- (57) Sonogo M, Schiappacassi M, Lovisa S et al. Stathmin regulates mutant p53 stability and transcriptional activity in ovarian cancer. *EMBO Mol Med* 2013 May;5(5):707-22.
- (58) Khurana A, McKean H, Kim H et al. Silencing of HSulf-2 expression in MCF10DCIS.com cells attenuate ductal carcinoma in situ progression to invasive ductal carcinoma in vivo. *Breast Cancer Res* 2012;14(2):R43.

- (59) Hao J, Xu A, Xie X et al. Elevated expression of UBE2T in lung cancer tumors and cell lines. *Tumour Biol* 2008;29(3):195-203.
- (60) Ueki T, Park JH, Nishidate T et al. Ubiquitination and downregulation of BRCA1 by ubiquitin-conjugating enzyme E2T overexpression in human breast cancer cells. *Cancer Res* 2009 November 15;69(22):8752-60.
- (61) Liu Z, Ling K, Wu X et al. Reduced expression of cenp-e in human hepatocellular carcinoma. *J Exp Clin Cancer Res* 2009;28:156.
- (62) Hauser S, Ulrich T, Wurster S, Schmitt K, Reichert N, Gaubatz S. Loss of LIN9, a member of the DREAM complex, cooperates with SV40 large T antigen to induce genomic instability and anchorage-independent growth. *Oncogene* 2012 April 5;31(14):1859-68.
- (63) Huang CJ, Yang SH, Lee CL, Cheng YC, Tai SY, Chien CC. Ribosomal protein S27-like in colorectal cancer: a candidate for predicting prognoses. *PLoS One* 2013;8(6):e67043.
- (64) He H, Sun Y. Ribosomal protein S27L is a direct p53 target that regulates apoptosis. *Oncogene* 2007 April 26;26(19):2707-16.
- (65) Doolan P, Clynes M, Kennedy S et al. TMEM25, REPS2 and Meis 1: favourable prognostic and predictive biomarkers for breast cancer. *Tumour Biol* 2009;30(4):200-9.
